# 1 ***PRDM9* losses in vertebrates are coupled to those of paralogs** 2 ***ZCWPW1* and *ZCWPW2***

3 Maria Izabel A. Cavassim<sup>1,2,\*,&</sup>, Zachary Baker<sup>2,\*,&</sup>, Carla Hoge<sup>2</sup>, Mikkel H. Schierup<sup>1</sup>,  
4 Molly Schumer<sup>4</sup>, and Molly Przeworski<sup>2,3</sup>

## 5 6 **Author affiliations:**

7 <sup>1</sup>Bioinformatics Research Centre, Aarhus University, Aarhus, Denmark

8 <sup>2</sup>Department of Biological Sciences, Columbia University, New York City, United States

9 <sup>3</sup>Department of Systems Biology, Columbia University, New York City, United States

10 <sup>4</sup>Department of Biology, Stanford University, Stanford, United States

11 \* Joint first authors

12 + Present address: Department of Ecology and Evolutionary Biology, University of California, Los  
13 Angeles, United States

14 ^ Present address: Department of Genetics, University of Cambridge, Cambridge, United  
15 Kingdom

16 & to whom correspondence should be addressed: [izabelcavassim@gmail.com](mailto:izabelcavassim@gmail.com), [zb267@cam.ac.uk](mailto:zb267@cam.ac.uk)

17

## 18 **Abstract**

19 In most mammals and likely throughout vertebrates, the gene *PRDM9* specifies the  
20 locations of meiotic double strand breaks; in mice and humans at least, it also aids in their repair.  
21 For both roles, many of the molecular partners remain unknown. Here, we take a phylogenetic  
22 approach to identify genes that may be interacting with *PRDM9*, by leveraging the fact that  
23 *PRDM9* arose before the origin of vertebrates, but was lost many times, either partially or entirely—  
24 —and with it, its role in recombination. As a first step, we characterize *PRDM9* domain composition  
25 across 446 vertebrate species, inferring at least thirteen independent losses. We then use the  
26 interdigitation of *PRDM9* orthologs across vertebrates to test whether it co-evolved with any of  
27 241 candidate genes co-expressed with *PRDM9* in mice or associated with recombination  
28 phenotypes in mammals. Accounting for the phylogenetic relationship among species, we find  
29 two genes whose presence and absence is unexpectedly coincident with that of *PRDM9*:  
30 *ZCWPW1*, which was recently shown to facilitate double strand break repair, and its paralog  
31 *ZCWPW2*, as well as more tentative evidence for *TEX15* and *FBXO47*. *ZCWPW2* is expected to  
32 be recruited to sites of *PRDM9* binding; its tight coevolution with *PRDM9* across vertebrates  
33 suggests that it is a key interactor, with a role either in recruiting the recombination machinery or  
34 in double strand break repair.

## 35 Author Summary

36 Our understanding of meiotic recombination in mammals has seen great progress over  
37 the past 15 years, spurred in part by the convergence of lines of evidence from molecular biology,  
38 statistical genetics and evolutionary biology. We now know that in most mammals and likely in  
39 many vertebrates, the gene *PRDM9* specifies the location of meiotic double strand breaks and  
40 that in mice and humans at least, it also aids in their repair. For both roles, however, many of the  
41 molecular partners remain unknown. To search for these, we take a phylogenetic approach,  
42 leveraging the fact that the complete *PRDM9* has been lost at least thirteen times in vertebrates  
43 and thus that its presence is interdigitated across species. By this approach, we identify two genes  
44 whose presence or absence across vertebrates is coupled to the presence or absence of *PRDM9*,  
45 *ZCWPW1* and *ZCWPW2*, as well as two genes for which the evidence is weaker, *TEX15* and  
46 *FBXO47*. *ZCWPW1* was recently shown to be recruited to sites of *PRDM9* binding and to aid in  
47 the repair of double strand breaks. *ZCWPW2* is likely recruited to sites of *PRDM9* binding as well;  
48 its tight coevolution with *PRDM9* across vertebrates suggests that it plays an important role either  
49 in double strand break formation, potentially as the missing link that recruits the recombination  
50 machinery to sites of *PRDM9* binding, or in double strand break repair.

## 51 Introduction

52 Meiotic recombination is initiated by the deliberate infliction of numerous double strand  
53 breaks (DSBs) in the genome, the repair of which yields crossover and non-crossover resolutions  
54 (reviewed in [1]). In mice and humans, and probably in most mammals, the localization of almost  
55 all DSBs is specified through the binding of *PRDM9* [2–4]. Yet the presence of a *PRDM9* binding  
56 site is far from sufficient for a DSB to be made: a number of additional factors modulate whether  
57 *PRDM9* binds or act downstream of *PRDM9* binding [5–7].

58 The mechanism by which *PRDM9* directs recombination to the genome is partially  
59 understood: it binds DNA through a C2H2 zinc finger (ZF) array and contains a SET domain that  
60 tri-methylates histones H3K4 and H3K36 [8,9]. These epigenetic marks together recruit the DSB  
61 machinery, notably *SPO11* (which makes the DSBs), through intermediates that remain unknown  
62 [10]. In addition to the zinc finger binding array and SET domain, most mammalian *PRDM9* genes  
63 also have two other domains, *KRAB* and *SSXRD*, whose functions are unclear.

64 The complete *PRDM9* protein, with all four domains, originated before the diversification  
65 of vertebrates, so has been conserved for hundreds of millions of years [11,12]. Yet the entire  
66 gene has also been lost numerous times, including in birds and canids [13–15]. In these species,

67 recombination occurs preferentially around promoter-like features, notably CpG islands [11,15–  
68 17]. A possible explanation is that in the absence of the histone marks laid down by PRDM9, the  
69 recombination machinery defaults to those residual H3K4me3 marks found in the genome, often  
70 associated with sites of transcription initiation, or perhaps simply to wherever DNA is accessible  
71 [15,18]. The same concentration of DSBs around promoter-like features is seen in *Prdm9*<sup>-/-</sup> mice  
72 [18] and in a woman who carries two loss of function copies of *PRDM9* identical by descent [19].  
73 These findings suggest that mammals that carry an intact *PRDM9* retain the mechanism to direct  
74 recombination employed by species lacking *PRDM9*, but it is normally outcompeted by PRDM9  
75 binding.

76 In addition to complete losses of *PRDM9*, multiple partial losses have occurred  
77 independently (e.g., in platypus and various fish lineages), usually involving the truncation of the  
78 N-terminal KRAB and SSXRD domains [11]. Although these partial *PRDM9* orthologs evolve  
79 under selective constraint and thus must have some conserved function [11], several lines of  
80 evidence indicate that they do not direct recombination. For one, only in species with a complete  
81 *PRDM9* is the ZF unusually rapidly evolving in its binding affinity [11]. Since the rapid evolution of  
82 the ZF is thought to arise from the role of PRDM9 in recombination [3,20,21], this evolutionary  
83 pattern suggests that all four domains are required for DSB localization. Empirical data support  
84 this notion: in swordtail fish carrying one *PRDM9* ortholog that lacks KRAB and SSXRD domains  
85 as well as in a mouse model in which only the KRAB domain is knocked out, recombination events  
86 are concentrated at promoter-like features, as in species lacking *PRDM9* altogether [11,22].  
87 Therefore, the KRAB domain at least appears to be necessary for PRDM9 to direct recombination,  
88 likely by mediating interactions with other proteins [22,23].

89 Conversely, the presence of a complete *PRDM9* with a rapidly evolving ZF outside of  
90 mammals [11] suggests that PRDM9 also directs recombination to the genome in these species,  
91 as has been reported for rattlesnakes [24]. Thus, at least two mechanisms for directing meiotic  
92 recombination are interdigitated within mammals as well as seemingly throughout the vertebrate  
93 phylogeny.

94 In addition to specifying the locations of DSBs, PRDM9 has recently been discovered to  
95 play a second role, in the downstream repair of DSBs [25–27]. In mice and humans, DSBs at  
96 which PRDM9 is bound on both homologs are more likely to be efficiently repaired and to result  
97 in a crossover; in contrast, DSBs at which PRDM9 is only bound on one of the two homologs are  
98 delayed in their repair [27,28]. If these “asymmetric” DSBs are overwhelming in number—as is  
99 the case in certain hybrid crosses in mice—this delay can lead to asynapsis and infertility [29,30].

100 While this second role of *PRDM9* is still poorly understood, recent papers report that it is  
101 facilitated by *ZCWPW1*, which binds H3K4me3 and H3K36me3 [25–27] and is expressed  
102 alongside *PRDM9* in single cell data from mouse testes [31]. One line of evidence that enabled  
103 the discovery of *ZCWPW1* is that although it too has been lost numerous times in vertebrates, it  
104 is found in seven clades that carry an intact *PRDM9* [26,27].

105 The important hint provided by the phylogenetic distribution of *ZCWPW1* points to the  
106 potential power of co-evolutionary tests to identify additional molecular partners of *PRDM9*. Here,  
107 we took this approach more systematically: we considered a set of 241 candidate genes that are  
108 either known to be involved in recombination in model organisms [32], associated with  
109 recombination phenotypes in a human genome-wide association study [33], or co-expressed with  
110 *PRDM9* in single cell data from mouse testes [31] and tested for their co-occurrence with *PRDM9*  
111 across 189 vertebrate species. After verifying our initial gene status calls in whole genome data  
112 and, for a subset of species, RNA-seq data, we identified the paralog of *ZCWPW1*, *ZCWPW2*, as  
113 co-evolving with *PRDM9* and found more tentative evidence for two additional genes, *TEX15* and  
114 *FBXO47*.

## 115 Results

### 116 A revised phylogeny of *PRDM9*

117 We previously reported that the complete *PRDM9* gene, including KRAB, SSXRD and  
118 SET domains, arose before the origin of vertebrates and was lost independently a number of  
119 times, both in its entirety and partially (through the loss of its N-terminal domains; [11]). Here, we  
120 leverage the independent losses of *PRDM9* in order to identify genes that are co-evolving with  
121 *PRDM9*—specifically, that tend to be present in the same species as *PRDM9* and lost (partially  
122 or entirely) when *PRDM9* is no longer complete.

123 As a first step, we characterized the phylogenetic distribution of *PRDM9* in light of new  
124 genome sequences published since our initial analysis [11]. To this end, we created a curated  
125 dataset of 747 vertebrate *PRDM9* sequences by analyzing publicly available protein sequences  
126 from Refseq [34], whole genome sequences, and RNA-seq data from testes samples, as well as  
127 four RNA-seq datasets from testes samples that we generated (see Methods, **Figure S1, Tables**  
128 **S1-3**). For this analysis, we defined *PRDM9* orthologs as complete if they contain both KRAB and  
129 SET domains; we did not consider the SSXRD domain, because its short length makes its  
130 detection at a given e-value threshold unreliable, or the ZF array, because its repetitive structure  
131 makes it difficult to sequence and assemble reliably.

132 Across 446 species, we identified 221 species with at least one complete *PRDM9* ortholog  
133 and 225 species without a complete *PRDM9* ortholog (**Figure 1, Table S4**). Notably, we were  
134 able to uncover complete *PRDM9* orthologs in a number of species for which we had previously  
135 predicted partial or complete losses [11], including in the Tasmanian devil (*Sarcophilus harrisi*),  
136 the atlantic cod (*Gadus morhua*), and the atlantic herring (*Clupea harengus*), as well as in a  
137 handful of placental mammals that we had previously only investigated using RefSeq (see **Table**  
138 **S4** for details). We also found a complete *PRDM9* ortholog in caecilians and in two species of  
139 frogs, suggesting that the previously reported loss of *PRDM9* in amphibians [11] reflects at least  
140 one loss in salamanders and more than one independent loss in frogs. We note, finally, that by  
141 the approach taken here, the *PRDM9* ortholog from the Australian ghostshark (*Callorhynchus milii*)  
142 is considered to be complete (in contrast to in Baker et al. 2017, where we also relied on the  
143 SSXR domain; see **Table S4** for details).

144 Given the phylogenetic relationships among species given by the TimeTree tool  
145 (<http://timetree.org/>; [35]), we inferred 23 putative complete or partial losses of *PRDM9* across the  
146 446 vertebrates considered (**Figure 1, Table S4**). These putative losses include six previously  
147 reported ones [11,13–15], each observed in two or more closely related species: in percomorph  
148 fish, cypriniformes fish, characiformes and siluriformes fish, osteoglossomorpha fish, birds and  
149 crocodiles, and canids. In addition, independent work supports our finding of a partial loss of  
150 *PRDM9* in the platypus (*Ornithorhynchus anatinus*) (J. Hussin and P. Donnelly, personal  
151 communication). In turn, the putative losses of *PRDM9* in polypteriformes fish, salamanders, and  
152 in three clades of frog species (*Xenopus*, *Dicroglossidae* and *Bufo*) were each supported by  
153 the absence of *PRDM9* in the genomes of two or more closely related species. We were further  
154 able to verify the absence of *PRDM9* in two *Xenopus* frogs and in two salamanders using RNA-  
155 seq data from testes: despite sufficient power to detect a set of six highly conserved meiotic genes  
156 in each species, we did not detect the expression of any complete *PRDM9* orthologs (**Table S3**).

157 We also failed to find *PRDM9* in RefSeq or the whole genome sequence of the green  
158 anole (*Anolis carolinensis*). We verified this absence of *PRDM9* by collecting RNA-seq data from  
159 testes in the green anole as well as in the fence lizard (*Sceloporus undulatus*), for which neither  
160 a Refseq nor a genome sequence were available at the time. Despite sufficient power to detect a  
161 set of six highly conserved meiotic genes, we were unable to detect *PRDM9* expression in either  
162 species (**Figure S2-3, Table S3**). Given the presence of a complete *PRDM9* in bearded dragons  
163 (*Pogona vitticeps*), it appears that this loss of *PRDM9* occurred in a lineage basal to the common  
164 ancestor of green anoles and fence lizards, over 99 Mya but less than 157 Mya (**Figure S5**).

165 The remaining 10 putative absences of *PRDM9* are observed in single species; we were  
166 unable to verify the calls using testis RNA-seq data, so their *PRDM9* status remains uncertain.  
167 Thus, in total, we identified at least 13 independent *PRDM9* losses in vertebrates, and possibly  
168 as many as 23 (**Figure 1, Table S4**). The 13 losses are all relatively old (**Figure S4**): the most  
169 recent case manifest in these data is either the one that happened in the branch leading to  
170 platypus or the one in canids, which could be as recent as 14.2 Mya (**Figure S4**).

## 171 172 **Identifying genes co-evolving with *PRDM9***

173 We selected 193 candidate genes based on their co-expression with *PRDM9* in single  
174 cell RNA-seq data from mouse testes (specifically, in component 5; see Methods [31]) (**Figure**  
175 **S6A-B**). To this set, we added any gene associated with variation in recombination phenotypes  
176 in humans [33] as well as genes known to have a role in mammalian meiotic recombination from  
177 functional studies (summarized in [32]). Together, these three sources provided a total of 241  
178 genes to evaluate for possible co-evolution with *PRDM9* (**Table S5, Figure S6C**).

179 We evaluated the presence or absence of these 241 genes across the NCBI RefSeq  
180 database of 189 species. These 189 species were downsampled from the larger phylogenetic  
181 tree to preserve at most three species with high quality genomes below each *PRDM9* loss,  
182 thereby minimizing phylogenetic signals of genome quality. The phylogeny includes  
183 representative species for 11 of the 13 inferred *PRDM9* losses (see Methods, **Figure S7**). Species  
184 of *Bufo* frogs and salamanders were not included due to the absence of available gene  
185 annotations; moreover, due to the lack of gene annotations for frog species with *PRDM9*, within  
186 these 189 species, the losses in *Xenopus* and *Dicroglossidae* frogs cannot be distinguished from  
187 a single event.

188 We encoded a gene as present when it contained all the domains found in four  
189 representative vertebrates with a complete *PRDM9* and absent if it lacked one or more of those  
190 domains (see Methods). Many of the 241 genes are present in every sampled vertebrate and  
191 hence provide no information in our co-evolutionary test of presence and absence: specifically,  
192 we found apparently complete orthologs for 102 candidate genes in all 189 species used in the  
193 phylogenetic test. We therefore focused on the remaining 139 genes, each of which has been  
194 lost at least once among vertebrate species evaluated here; the matrix of 189x139 gene status  
195 calls is presented in **Table S6**.

196 We tested for the co-evolution of *PRDM9* and each candidate gene by comparing a null  
197 model with independent rates of gains and losses of *PRDM9* and of the focal gene to an  
198 alternative model in which the state transition rates of the two genes are dependent on one



199 another, using the maximum likelihood approach within *BayestraitsV3* [36,37] (**Table S7, Figure**  
200 **S8**). By this approach, we identified nine significant hits at the 5% level (uncorrected for multiple  
201 tests): in order of increasing p-values, *ZCWPW1*, *MEI1*, *ZCWPW2*, *TEX15*, *FBXO47*, *ANKRD31*,  
202 *NFKBIL1*, *SYCE1*, and *FMR1NB*. We focused on the top five, for which the false discovery (FDR)  
203 value is below 50% (**Table 1, Figure 2A**).

204 We sought to verify the phylogenetic distribution of the top genes by developing curated  
205 datasets of high confidence orthologs, as we had for *PRDM9* (see Methods; **Figure 3, Tables S1**  
206 **and S8, Figure S8**). In doing so, we were able to identify *MEI1* orthologs from the whole genome  
207 assemblies of each species missing *MEI1* in our initial dataset, resulting in the presence of *MEI1*  
208 in every species considered (**Table S1**); thus, it appears that its inferred co-evolution with *PRDM9*  
209 based on Refseq calls is artifactual (see Methods). Rerunning the phylogenetic test on the curated  
210 ortholog sets for the remaining four genes, *TEX15* is no longer significant at the 5% level  
211 ( $p=0.086$ ), possibly because the curation uncovered an intact *TEX15* ortholog in anoles.  
212 *ZCWPW1* and *ZCWPW2* are still highly significant; for *FBXO47*, the curation did not reveal any  
213 discrepancy with the initial calls, so the p-value remains the same.

214 Our approach therefore uncovered two genes with clear-cut evidence of co-evolution with  
215 *PRDM9*, the paralogs *ZCWPW1* and *ZCWPW2*, and more tentative support for two others, *TEX15*  
216 and *FBXO47*. *ZCWPW1*, *ZCWPW2* and *TEX15* were among our initial list of 241 candidate genes  
217 because they are co-expressed with *PRDM9* in single cell testis data from mouse [31] (**Figure**  
218 **2B; Figure S6**). *FBXO47* was not included by that criterion but because missense mutations in  
219 the gene are associated with recombination rate variation in the total genetic map length in  
220 humans, in both males and females [33]. Nonetheless, the expression of *FBXO47* in mice is testis-  
221 specific [38], and the gene is expressed in the component in which *PRDM9* had the highest  
222 loading (albeit with a smaller loading [31] **Figure 2B**; see also [39]).

223 Like *PRDM9*, *ZCWPW1*, *ZCWPW2*, *FBXO47* and *TEX15* are inferred to have been  
224 present in the common ancestor of vertebrates. Below we describe the distribution of each of the  
225 four genes across the phylogeny of 189 species and the patterns that give rise to the evidence of  
226 statistical association with *PRDM9*-in particular, the correspondence between their distributions  
227 and that of 11 well supported losses of *PRDM9*, as well as of 9 species for which the status of  
228 *PRDM9* is uncertain.

229

### 230 *ZCWPW1* and *PRDM9* co-evolution

231 Our finding that *ZCWPW1* is co-evolving with *PRDM9* ( $p=0.0019$  in the curated set; **Table**  
232 **1**) is in line with previous reports of an association in vertebrates between the presence and

233 absence of *ZCWPW1* and *PRDM9* orthologs [26,27]. Here, we found an even tighter coupling of  
234 *PRDM9* and *ZCWPW1* than previously documented. Specifically, we inferred 12 losses of  
235 *ZCWPW1* among 189 species used in our phylogenetic test, distributed across 17 species that  
236 lack *ZCWPW1* entirely and two species carrying partial *ZCWPW1* genes (with the PWWP domain  
237 but not the zf-CW domain; **Table S8**).

238         Seven of the *ZCWPW1* losses occur among the 11 well supported losses of *PRDM9*: in  
239 cypriniformes fish, percomorph fish (*Euacanthomorpha*), siluriformes fish, polypteriformes  
240 fish, osteoglossomorpha fish, birds, and *Dicroglossidae* frogs. An additional *ZCWPW1* loss  
241 occurred in the denticle herring (*Denticeps clupeioides*), a species for which the status of *PRDM9*  
242 is uncertain. The remaining four losses of *ZCWPW1* seem to break the pattern, in that they occur  
243 in lineages containing a complete *PRDM9* gene. However, three are observed only in a single  
244 species and may be spurious. Therefore, across the tree, there is only one well supported case  
245 of a taxon with an intact *PRDM9* that has nonetheless lost *ZCWPW1*, supported by two closely  
246 related species, the tiger snake (*Notechis scutalus*) and the eastern brown snake (*Pseudonaja*  
247 *textilis*) (see **Table S8** for details).

248         In mice as well as human cell lines, *ZCWPW1* binds two marks laid down by *PRDM9*: the  
249 zf-CW domain binds H3K4me3 and the PWWP domain H3K36me3 [40–42]. Thus, the co-  
250 evolution across vertebrates likely reflects a conserved molecular interaction between *ZCWPW1*  
251 and *PRDM9* as reader and writer of these dual histone modifications.

252

### 253 *ZCWPW2* also co-evolves with *PRDM9*

254         Intriguingly, the strongest association with the presence or absence of *PRDM9* is that of  
255 the paralog of *ZCWPW1*, *ZCWPW2* ( $p=5 \times 10^{-6}$ ; **Table 1**). Among the 189 species, there are 12  
256 independent losses, distributed across 21 species that appear to lack *ZCWPW2* altogether and  
257 three that contain partial *ZCWPW2* genes (two with the PWWP domain but not the zf-CW domain,  
258 and one with the reverse; **Table S8**).

259         Six of the *ZCWPW2* losses occur among the 11 well supported losses of an intact *PRDM9*:  
260 in percomorph fish, polypteriformes fish, *Xenopus* frogs, *Dicroglossidae* frogs, birds, and the  
261 green anole. In order to distinguish whether the absence of *ZCWPW2* in *Xenopus* and  
262 *Dicroglossidae* frogs reflects a single loss or multiple events, we investigated the status of  
263 *ZCWPW2* in an additional species of frog with *PRDM9* (*Ranitomeya imitator*). We were able to  
264 successfully identify a complete *ZCWPW2* ortholog in this species, suggesting that *ZCWPW2* has  
265 indeed been lost at least twice within frogs, possibly coincidentally with *PRDM9* in each case.  
266 *ZCWPW2* is also absent in a clade encompassing cypriniformes fish and siluriformes fish, as well



267 as the electric eel (*Electrophorus electricus*), which has an intact *PRDM9*. This phylogenetic  
268 distribution suggests that the loss of *ZCWPW2* may have occurred before the losses of *PRDM9*  
269 in both cypriniformes fish and siluriformes fish. Also suggestive of this order of loss, *ZCWPW2* is  
270 absent in osteoglossomorpha fish (the Asian arowana, *Scleropages formosus*); in this case, the  
271 gene is also absent from the closest evolutionary relative in the tree, the elephantfish  
272 (*Paramormyrops kingsleyae*), which carries *PRDM9*.

273 Among the nine species for which the status of *PRDM9* is uncertain, *ZCWPW2* is absent  
274 in the denticle herring (*Denticeps clupeoides*). The remaining three cases of *ZCWPW2* loss are  
275 each observed in a single species carrying an intact *PRDM9*, without supporting lines of evidence.  
276 In summary, in the few cases with *PRDM9* but not *ZCWPW2*, we cannot verify the loss of  
277 *ZCWPW2*; conversely, the only species with *ZCWPW2* but that clearly lack *PRDM9* are canids  
278 and the platypus, the two lineages that experienced the most recent losses of *PRDM9* (see **Table**  
279 **S8** for details).

280 Like its paralog, *ZCWPW2* contains zf-CW and PWWP domains, predicted to bind  
281 H3K4me3 and H3K36me3, respectively (**Figure 4A, Figure S10**). As in *ZCWPW1* ([27], [26]),  
282 these domains are highly conserved, especially at residues with predicted binding properties  
283 (**Figure 4B-C**), suggesting that *ZCWPW2* is also recruited to sites of *PRDM9* binding.

284

### 285 **The distribution of *FBXO47* and *TEX15* orthologs**

286 We identified two additional genes, *FBXO47* and *TEX15*, that may be co-evolving with  
287 *PRDM9*: using the curated calls,  $p=0.016$  and  $p=0.087$ , respectively (**Table 1**). *TEX15* is co-  
288 expressed with *PRDM9* in two components inferred from single cell data from mice, active during  
289 pre-leptotene and zygotene (**Figure S6**). The statistical evidence for co-evolution stems from the  
290 fact that *TEX15* is missing in two taxa lacking *PRDM9*: birds and percomorph fish. *TEX15* is also  
291 absent in the Atlantic cod (*Gadus morhua*), suggesting that the loss of *TEX15* that led to its  
292 absence in percomorph fish occurred before that of *PRDM9*. All of the other 189 species  
293 considered have an intact *TEX15* (see **Table S8** for details).

294 The statistical evidence is a bit stronger for *FBXO47*, which has been lost five times in the  
295 absence of *PRDM9*: in cypriniformes fish, osteoglossomorpha fish, siluriformes fish, and in  
296 *Xenopus* and *Bufo* frogs. Intriguingly, *FBXO47* is additionally absent in the electric eel, a  
297 species that carries a complete *PRDM9* gene, but lacks both *ZCWPW1* and *ZCWPW2*. Testing  
298 for the co-evolution of the candidate genes with each other, a null model in which the state  
299 transitions of *FBXO47*, *ZCWPW1* and *ZCWPW2* are independent is rejected for all pairs of genes

300 (maximal  $p < 6 \times 10^{-3}$ ; **Table S9A**), and p-values are lower for *FBXO47* and *ZCWPW1*, or *FBXO47*  
301 and *ZCWPW2*, than for *FBXO47* and *PRDM9*.

302 In summary, by extending the reconstruction of *PRDM9* to 446 vertebrate species, we  
303 identified thirteen losses that are supported by more than one species or by independent  
304 evidence, and possibly as many as 23. Focusing on a subset of 189 species that capture eleven  
305 state transitions of *PRDM9*, we tested whether *PRDM9* transitions coincide with those of 139  
306 candidate genes lost at least once across vertebrates. After carefully vetting the ortholog calls for  
307 our top five signals, we identified two genes that are clearly co-evolving in their presence and  
308 absence with *PRDM9*, *ZCWPW1* and its paralog *ZCWPW2*, and two for which the evidence is  
309 weaker: *FBXO47* and most tentatively, *TEX15*.

310

## 311 Discussion

### 312 Dual roles of *PRDM9* across vertebrates

313 We had previously hypothesized that *PRDM9* plays a role in directing recombination not  
314 only in mammals but across vertebrates, based on the presence of an intact ortholog across  
315 vertebrates with a rapidly-evolving zinc finger [11]. Consistent with our prediction, there is  
316 tentative evidence for the influence of *PRDM9* binding on recombination in rattlesnakes [24]. That  
317 a gene with a known role in recombination, *ZCWPW1* co-evolves with *PRDM9* across vertebrates  
318 lends further support to this hypothesis.

319 The precise nature of the molecular interactions between *PRDM9* and *ZCWPW1* remains  
320 unknown, but recent evidence suggests that *ZCWPW1* interacts with *PRDM9* to facilitate the  
321 repair of *PRDM9*-dependent DSBs: notably, *Zcwpw1*<sup>-/-</sup> male mice and older female mice are  
322 sterile [27,43] and exhibit defects in their ability to repair DSBs [25–27]. In turn, the genomic  
323 locations of DSBs are not altered in *Zcwpw1*<sup>-/-</sup> mice, indicating that the gene does not play a role  
324 in DSB positioning [25–27]. In light of these experimental results, the co-evolution of *PRDM9* with  
325 *ZCWPW1* across vertebrates indicates that *PRDM9* likely plays a role in the efficient repair of  
326 DSBs not only in mice and humans [25,26,44,45], but across the vertebrate phylogeny.

327

### 328 Nature of the co-evolution of candidate genes with *PRDM9*

329 If a gene interacts with *PRDM9* by reading its histone modifications, as is the case for  
330 *ZCWPW1* [25–27] and likely *ZCWPW2* (**Figure 4**), and has no other roles, we would expect that  
331 gene to be dispensable in species that no longer have an active *PRDM9* SET domain. Previous  
332 papers reported that *ZCWPW1* is more likely to be missing from ray-finned fish with substitutions  
333 in catalytic tyrosine residues of the SET domain, in addition to clades lacking the entire *PRDM9*

334 gene [26,27]. In our analysis, we find that both *ZCWPW1* and *ZCWPW2* are more likely to be  
335 absent from species carrying only *PRDM9* orthologs with substitutions in at least one catalytic  
336 tyrosine residue, as well as those lacking *PRDM9* altogether (**Figure 3**).

337 While this pattern suggests a dependence of *ZCWPW1* and *ZCWPW2* on the intact  
338 catalytic activity of *PRDM9*, the interpretation is complicated by the fact that all species with  
339 substitutions at the tyrosine residues in all *PRDM9* copies are also carrying only partial *PRDM9*  
340 orthologs lacking KRAB and SSXR domains, and nearly all species with conserved tyrosine  
341 residues also carry a complete copy of *PRDM9*. In that regard, the few exceptions are informative:  
342 among species with confident *PRDM9* calls, the platypus and siluriformes fish carry *PRDM9*  
343 orthologs putatively missing the KRAB domain but with intact tyrosine residues. *ZCWPW2* is  
344 absent from all three considered siluriformes fish species while *ZCWPW1* is absent from one.  
345 Thus, the presence of *ZCWPW1* and *ZCWPW2* may depend on that of the KRAB domain rather  
346 than, or in addition to, the tyrosine residues remaining intact.

347 Similar considerations suggest that in the rare lineages where *ZCWPW1*, *ZCWPW2*,  
348 *FBX047* and *TEX15* are present in the absence of *PRDM9*, we might expect the genes to be  
349 under relaxed selective constraint. To examine this prediction, we tested whether  $\omega = dn/ds$  was  
350 higher in lineages without a complete *PRDM9* (where  $dn$  is the rate of non-synonymous  
351 substitutions and  $ds$  the rate of synonymous substitutions; see Methods). For *ZCWPW1*, there  
352 was no evidence for a relaxation of selection ( $p > 0.13$ ; **Table S10**). The intriguing exception is in  
353 platypus, one of the few species that has a SET domain with intact tyrosine residues but is lacking  
354 the KRAB domain ( $p = 0.038$ ; in all other cases,  $p > 0.13$ ; **Table S10**). This observation lends further  
355 support to the notion that the conservation of *ZCWPW1* may depend on the KRAB domain rather  
356 than, or in addition to, the tyrosine residues of *PRDM9*.

357 For *ZCWPW2*, the same test revealed that a model in which all species have the same  
358  $\omega$  is significantly less likely than one in which  $\omega$  is elevated in lineages lacking a complete *PRDM9*;  
359 in particular, in canids and platypus ( $p = 0.0003$ ; **Table S10**). In fact, in canid lineages (fox and  
360 dogs), for which the loss of *PRDM9* is ancestral, *ZCWPW2* is no longer under any discernible  
361 selective constraint (testing a null model of  $\omega = 1$ ,  $p = 0.307$ ; **Table S10**). Considered together with  
362 the observation that *ZCWPW2* is absent from all the other lineages in which a complete *PRDM9*  
363 gene is clearly absent, these evolutionary analyses suggest that *ZCWPW2* is dispensable in the  
364 absence of a complete *PRDM9* ortholog.

365 The molecular function of *ZCWPW2* is to our knowledge unknown. Like its paralog, it could  
366 be involved in the processing or repair of DSBs. If so, the observation that *Zcwpw1*<sup>-/-</sup> mice show  
367 defective DSB processing and repair [25–27] suggests that the role of *ZCWPW2* cannot be

368 completely redundant with that of its paralog. Alternatively, by reading the dual marks laid down  
369 by PRDM9, ZCWPW2 might help to recruit the recombination machinery (in particular SPO11)  
370 and thus play an earlier role in the positioning of DSBs. While in yeast, the link between histone  
371 modifications (specifically, H3K4me3) and the recruitment of Spo11 is made by Spp1 [46], in  
372 mammals, the ortholog of Spp1, CXXC1, is not essential for meiosis [47], and the gene that plays  
373 the analogous role has not yet been identified. Our analysis highlights ZCWPW2 as a potential  
374 candidate for this role, to be tested experimentally.

375 For *TEX15*,  $\omega$  is also higher in lineages where *PRDM9* is absent or incomplete ( $p=0.0036$   
376 for fish and  $p=0.015$  for mammals), but remains significantly below 1 (**Table S10**), indicating that  
377 in the absence of *PRDM9*, *TEX15* is not dispensable. If *TEX15* and *PRDM9* are indeed co-  
378 evolving, the relationship is likely to be indirect; for instance, recent work implicates *TEX15* as an  
379 effector of piRNA-mediated transposable element (TE) methylation and silencing [48,49]. Male  
380 mouse knockouts of *Tex15* exhibit a meiotic arrest phenotype associated with the failure to repair  
381 DSBs and to undergo chromosomal synapsis [45], as well as the transcriptional activation of TEs  
382 [48,49]. This phenotype is similar to those observed in mouse knockouts of other piRNA-pathway  
383 genes, such as *Miwi* or *Dnmt3* [50]. In *Dnmt3* knockout mice, it has been shown that TEs  
384 accumulate both H3K4me3 marks and SPO11-dependent DSBs, suggesting that the methylation  
385 of TEs serves not only to silence them, but may also result in preventing their use as sites of  
386 recombination [50]. Thus, *TEX15* could conceivably play an important but indirect role in  
387 preventing the binding of PRDM9 to TEs.

388 For *FBXO47*,  $\omega$  is higher in fish lineages where *PRDM9* is absent or incomplete  
389 ( $p=0.0023$ ), but remains significantly below 1, while in mammals, there is no evidence for  
390 relaxation of constraint (**Table S10**). Like *TEX15*, if *FBXO47* and *PRDM9* are co-evolving, the  
391 relationship is likely to be indirect. *FBXO47* is a member of the F-box protein family, which act as  
392 recognition subunits of Skp1-Cullin1-F-Box protein (SCF) E3 ubiquitin ligase complexes [38,51].  
393 Recently, *FBXO47* has been implicated as a key regulator of the telomere shelterin complex  
394 during meiotic prophase I, and in mice is necessary for telomere nuclear envelope attachment  
395 and subsequent events, including DSB repair [38]. One possibility for increased conservation of  
396 *FBXO47* in the presence of *PRDM9* would be if this role of *FBXO47* contributes to the formation  
397 of a chromatin environment that aids in the repair of PRDM9-dependent DSBs, or possibly in the  
398 recruitment of ZCWPW1.

399

400

401 **Which loss came first?**

402 While *PRDM9* has two distinct roles—in specifying the location of DSBs and in facilitating  
403 their repair—the four candidate genes that we have identified may only be involved in one of  
404 these two roles. If so, the dependencies between the presence of *PRDM9* and of these genes  
405 may be asymmetric. For instance, if we ignore possible pleiotropic roles of the candidate genes,  
406 and assume *ZCWPW1* and *FBX047* play roles in, or related to, repair but not DSB localization,  
407 we would predict that their loss occurs after that of *PRDM9* (as appears to have been the case  
408 in *Tachysurus fulvidraco* for both genes, and for *FBX047* in *Xenopus laevis*; **Table S8B**). In  
409 contrast, if *ZCWPW2* is involved in DSB localization but not repair, we would predict it could be  
410 lost before *PRDM9* (as was seemingly the case in two lineages of ray-finned fish; **Table S8B**).  
411 The phylogenetic data considered here do not allow us to distinguish between these scenarios:  
412 there is statistical evidence for a dependence of state transitions of *ZCWPW1*, *ZCWPW2*,  
413 *FBX047* and *TEX15* on *PRDM9* as well as vice versa (in all tests, maximum  $p < 0.07$ , testing the  
414 null model of no dependence against either dependence as an alternative model; **Table S11**).  
415 These scenarios could potentially be distinguished by collecting more fine-grained phylogenetic  
416 information to pinpoint the specific lineages in which the first loss occurred, as well as in light of  
417 further experimental data.

418

## 419 Outlook

420 Our phylogenetic analysis allowed us to identify novel putative interactors of *PRDM9* that  
421 are promising candidates for functional studies. For this analysis, the power comes from the  
422 repeated losses of *PRDM9*—in our case, from eleven transitions from presence to absence.  
423 Confounding these kinds of analyses, however, are issues of data quality and in particular  
424 absences of complete *PRDM9* orthologs that reflect poor genome quality rather than true losses.  
425 To address this issue, we validated any absence in Refseq with whole genome searches and  
426 where possible, *de novo* assemblies from RNA-seq data, leading us to realize that in one case  
427 (*MEI1*), the apparent co-evolution with *PRDM9* was in fact spurious.

428 A more subtle but related issue stems from a phylogenetic signal of genome quality, which  
429 can lead to apparent clustering of losses. To minimize this issue, we restricted our analysis to  
430 genomes that included most “core” eukaryotic genes (**Fig. S7**) and downsampled our tree to  
431 include at most three species below every inferred *PRDM9* loss. As genome qualities improve  
432 and as their assemblies become more uniform (eg., [52]), these issues should be alleviated.  
433 Moreover, as species are added to the phylogeny, additional losses will be identified: as one  
434 example, our identification of two species of frogs with a complete *PRDM9* revealed that *PRDM9*  
435 had not been lost once in the common ancestor, as had been inferred using fewer species by



436 Baker et al. (2017), but has instead been lost more than once within amphibians. This discovery  
437 also suggests that frogs may be an interesting clade within which to study the steps by which  
438 PRDM9 and its partners are lost.

439 Beyond the application to *PRDM9* and meiotic recombination, our analysis illustrates how  
440 long-standing phylogenetic approaches can now be applied to comparative genomic data to  
441 identify novel molecular interactions [53]. Such analyses need not be restricted to measurements  
442 of presence or absence of whole genes, as we have done here, but could focus exclusively on  
443 specific domains, indicative of specific subfunctions, or consider how rates of evolution in specific  
444 domains depend on the presence or absence of other genes. With the explosion of high quality  
445 and more representative sets of genomes now coming on line (e.g., [52], [54]), and the  
446 development of statistical methods that consider both binary and continuous character evolution  
447 jointly, we expect this type of approach to become increasingly widespread.

448

## 449 **Material and Methods**

### 450 **1. Identification of PRDM9 orthologs**

451 As a first step towards characterizing the distribution of *PRDM9* in vertebrates, we  
452 identified putative *PRDM9* orthologs in the RefSeq database with a *blastp* search [30], using the  
453 N-terminal portion of the *Homo sapiens* PRDM9 protein sequence containing KRAB, SSXRD and  
454 SET domains as the query sequence (RefSeq accession: NP\_001297143; amino acid residues  
455 1-364). We downloaded the corresponding GenBank file for 5,000 hits (3,400 unique genes from  
456 412 species) and characterized the presence or absence of KRAB, SSXRD and SET domains for  
457 each record using the Conserved Domain, Protein Families, NCBI curated and SMART databases  
458 (CDD [55]; Pfam (REF); NCBI curated (REF); SMART (REF); accessions cl02581 and cl09744  
459 for the KRAB and SSXRD domains respectively, and accessions cl40432 and cl02566 for the  
460 SET domain), annotating each domain as present if that domain had an e-value less than 1 in  
461 any of the four databases. We then removed alternative transcripts from the dataset by  
462 preferentially keeping, for each unique gene, the transcript with the maximal number of annotated  
463 domains. When there were multiple transcripts with the same maximal number of domains, we  
464 kept the longest one.

465 Because *PRDM9* shares its SET domain with other PRDM family genes and its N-terminal  
466 domains with members of the KRAB-ZF and SSX gene families, many of these hits are potential  
467 PRDM9 paralogs. To identify bona fide *PRDM9* orthologs from this initial set of genes, we sought  
468 to build phylogenetic trees specific to the KRAB, SSXRD, and SET domains and remove

469 homologs that cluster with genes annotated as distantly related paralogs of *PRDM9*. To this end,  
470 we extracted the amino acid sequences for complete KRAB, SSXRD, and SET domains, and for  
471 each domain, constructed neighbor-joining trees using Clustal Omega [56]. Utilizing the KRAB  
472 and SSXRD domain-based trees, we identified and removed 87 genes that visually cluster with  
473 members of the SSX gene family (**Fig. S1A-B**). Analyzing the SET domain-based tree, we  
474 identified and removed 2,637 genes that group with other members of the *PRDM* gene family  
475 (**Fig. S1C**; see figure legend for details). We ultimately retained 625 genes, each of which cluster  
476 with *PRDM9* in one or more of these trees.

477 By this approach, in the 412 species considered, we identified 209 *PRDM9* orthologs  
478 containing KRAB, SSXRD and SET domains from 155 species, as well as 13 *PRDM9* orthologs  
479 containing KRAB and SET domains for which we were unable to detect an SSXRD domain with  
480 an e-value less than 1 from an additional 11 species. For the 246 species for which we were  
481 unable to identify a *PRDM9* ortholog spanning KRAB and SET domains in our initial search of  
482 the RefSeq database, we sought to verify that *PRDM9* was truly absent using a number of  
483 approaches.

484 As a first step, we performed an additional blastp search against the non-redundant  
485 protein sequence (nr) database, targeting only those species in order to identify any annotated  
486 gene record missed in our initial search of the RefSeq database. We downloaded the  
487 corresponding GenBank file for each hit with >55% coverage and >40% identity and, after  
488 removing records corresponding to those we had previously identified, annotated domains and  
489 removed alternative transcripts as before. We then verified the orthology of the remaining records  
490 by blasting each protein sequence against the human RefSeq database, accepting it as a *PRDM9*  
491 ortholog if the top hit was *PRDM9* or its paralog *PRDM7*. This approach enabled the identification  
492 of an additional 9 *PRDM9* orthologs, including one containing KRAB, SSXRD and SET domains,  
493 and one containing KRAB and SET domains.

494 Next, we performed a series of *tblastn* searches of the whole genome of the 244 species  
495 remaining using the N-terminal portion of the *Homo sapiens* *PRDM9* protein as a query. When  
496 we were unable to retrieve any promising hits with the human protein sequence, we re-performed  
497 the *tblastn* search using the N-terminal portion of a *PRDM9* ortholog from a species closely related  
498 to the focal species. In order to identify which of the identified contigs corresponded to genuine  
499 *PRDM9* orthologs (as opposed to paralogs such as *PRDM11*), we performed blastp searches  
500 against the *Homo sapiens* RefSeq database using the aligned protein sequences as query  
501 sequences. Contigs containing the relevant alignments spanning KRAB and/or SET domains  
502 were then downloaded and the aligned region including 10,000 of flanking sequence was

503 extracted and input into *Genewise* [57], using the PRDM9 protein sequence from *Homo sapiens*  
504 or a closely related species as a guide sequence (see **Table S2** for details). In genomes from 10  
505 species, we identified separate contigs containing the KRAB domain and the SET domain. In  
506 these cases, the contigs were concatenated before use as input in *Genewise*. These approaches  
507 enabled us to identify an additional 53 *PRDM9* orthologs from 33 species, including 21 *PRDM9*  
508 orthologs containing KRAB, SSXRD and SET domains from 21 species, and 24 *PRDM9* orthologs  
509 containing KRAB and SET domains but for which we were unable to identify the SSXRD domain  
510 from 11 species.

511 These analyses left 210 species for which we were unable to identify a *PRDM9* ortholog  
512 with both KRAB and SET domains. For these species, with the exception of 94 birds and  
513 crocodiles and 78 percomorpha fish, we additionally searched testis RNA-seq datasets when  
514 possible, including those generated for this study (see below; **Table S3**); this approach enabled  
515 us to identify two additional *PRDM9* orthologs containing KRAB and SET domains from two  
516 species of fish.

517 From this analysis, and given the phylogenetic relationships among species given by the  
518 TimeTree tool [35], we inferred 20 putative complete or partial losses of PRDM9 across the 412  
519 species represented in the RefSeq database. Of these, 7 losses were supported by the absence  
520 of PRDM9 in two or more closely related species: in percomorpha and beryciformes fish,  
521 characiformes and siluriformes fish, cypriniformes fish, polypteridae fish, frogs, birds and  
522 crocodiles, and canids. The remaining 13 inferred losses each corresponded to an individual  
523 species. In order to identify whether or not any of these 13 latter absences could be supported by  
524 additional species, and to more accurately infer the dates of each loss, we sought to investigate  
525 the status of PRDM9 in species closely related to each putative loss event. To this end, we  
526 investigated the whole genomes of an additional 18 species and RNA-seq datasets from an  
527 additional 4 species as before, with one species represented by both a whole genome sequence  
528 and a corresponding RNA-seq dataset (*Ambystoma mexicanum*). This approach enabled us to  
529 identify an additional 6 PRDM9 orthologs containing KRAB, SSXRD and SET domains from 6  
530 species, as well 15 additional species putatively lacking a complete PRDM9 gene. In doing so,  
531 we found that 2 additional losses were supported by the absence of PRDM9 in two or more closely  
532 related species: in osteoglossomorpha fish, as well as a loss within lizards shared by *Anolis*  
533 *carolinensis* and *Scleropages formosus*. For each of the 11 remaining instances in which only a  
534 single species was found to be lacking PRDM9, the most closely related species considered  
535 possessed a complete PRDM9 ortholog. While independent work supports our finding of a partial  
536 loss of PRDM9 in platypus (J. Hussin and P. Donnelly, personal communication), we do not have

537 confirmatory evidence of absence for the remaining 10 species, and therefor treat these species  
538 as having an uncertain PRDM9 status. Moreover, we identified two species of frogs carrying  
539 complete PRDM9 orthologs. This discovery suggests that PRDM9 has been lost repeatedly within  
540 amphibians – at least once in salamanders, and at least three times within frogs (with each of  
541 these four putative loss events being supported by the absence of the PRDM9 in two or more  
542 closely related species).

543 Lastly, we include in the list of species considered an additional 13 species for which we  
544 had previously identified complete PRDM9 orthologs [11] but which were not directly examined  
545 here (**Table S4**). Altogether, this pipeline resulted in the identification of 193 species in which we  
546 find a complete *PRDM9* ortholog containing KRAB, SSXR and SET domains, 26 species for  
547 which we identify *PRDM9* orthologs containing KRAB and SET domains but not SSXR domains,  
548 218 species for which we have evidence for the absence of a complete *PRDM9* gene, and 9  
549 species for which we were unable to make a confident determination (see **Tables S1-S4, Figure**  
550 **1**).

551 For each of the *PRDM9* orthologs that we identified, we characterized the conservation of  
552 three key tyrosine residues that have been shown to underlie the catalytic function of the human  
553 SET domain in vitro (i.e., Y276, Y341, and Y357; [58]) and for Y357, in vivo in mouse [10]. To this  
554 end, we constructed an alignment of the SET domain using Clustal Omega [56] and extracted the  
555 residues aligning to the human tyrosine residues from each of 678 SET domains (**Table S1**).

556

## 557 **2. Verification of genomic calls using RNA-seq data**

558 For four species in which we identified no *PRDM9* ortholog or only a partial ortholog, we  
559 investigated whether a complete *PRDM9* ortholog may nonetheless be present using RNA-seq  
560 data. We therefore sought to verify its absence from *Anolis carolinensis*, a species in which we  
561 had been unable to find a *PRDM9* ortholog in the genome assembly or Refseq, as well as a  
562 second reptile species, *Sceloporus undulatus*, for which Refseq data and a genome sequence  
563 were not available. To this end, we built a *de novo* RNA transcriptome assembly and tested for  
564 the expression of PRDM9 in testis and other tissue samples (see below).

565 Similarly, in two species in which we had originally identified only a partial ortholog of  
566 *PRDM9* (*Astyanax mexicanus* and *Clupea harengus*), we wanted to verify the incomplete domain  
567 structure inferred from the genome sequence by conducting a *de novo* transcriptome assembly  
568 (in *Clupea harengus*, this analysis turned out to be unnecessary, as an updated reference  
569 genome, GCA\_000966335.1, contains a complete *PRDM9*). To this end, we analyzed RNA-seq

570 data from male gonad surface from *Astyanax mexicanus* and liver and testis from *Clupea*  
571 *harengus*.

572 Dissected tissue samples preserved in RNAlater were kindly provided to us by Arild  
573 Folkvord and Leif Andersson (*Clupea harengus*), Cliff Tabin (*Astyanax mexicanus*), Tonia  
574 Schwartz and Tracy Langkilde (*Sceloporus undulatus*), and Athanasia Tzika (*Anolis carolinensis*).  
575 These samples were stored at -20°C until extraction and library preparation. Total RNA was  
576 extracted using the Qiagen RNeasy kit (Valencia, CA, USA) following the manufacturer's protocol.  
577 RNA was quantified and assessed for quality on a Qubit fluorometer and approximately 1 µg of  
578 total RNA was input for library preparation using the Kapa RNA-seq kit. Samples were prepared  
579 following the manufacturer's protocol, except that half reactions were used. Briefly, mRNA was  
580 purified using manufacturer's beads and chemically fragmented. First and second-strand cDNA  
581 was synthesized and end-repaired. Following A-tailing, each sample was individually barcoded  
582 with an Illumina index and amplified for 12 cycles. In order to evaluate the library quality and size  
583 distribution, libraries were evaluated on an Agilent TapeStation. The libraries were then  
584 sequenced over two runs on the NextSeq 550 at Columbia University to collect paired-end 150  
585 bp reads.

586 Illumina sequencing reads (248,820,547 2x150 base pair (bp) paired-end reads) were  
587 demultiplexed into individual sample fastq files with the software bcl2fastq2 (v2.20.0, Illumina).  
588 The FastQC software [59] was used for visual inspection of read quality. Adapters and low-quality  
589 reads were trimmed with the Trimmomatic software, which is bundled as a plugin within the Trinity  
590 *de novo* assembler [60] (v2.8.5) and was enabled using the `--trimmomatic` flag. The default  
591 trimming settings (phredscore>=5; slidingwindow:4:5; leading:5, trailing:5; minlen:25) were used  
592 following [61] recommendations. The pair-end reads were trimmed and *de novo* transcriptomes  
593 assembled with Trinity (v2.8.5) using the following parameters: `--seqType fq --SS_lib_type FR --`  
594 `max_memory 100G --min_kmer_cov 1 --trimmomatic --CPU 32`. Details on assembly quality are  
595 shown in **Fig. S2**. Gene expression data for all four species (*Anolis carolinensis*, *Sceloporus*  
596 *undulatus*, *Clupea harengus*, *Sceloporus undulatus*) are available from the NCBI sequence read  
597 archive (Bioproject PRJNA605699, SRA accessions: SRR11050679-SRR11050687).

598 To evaluate whether PRDM9 was present in the transcriptome data, we conducted a  
599 *tblastn* search (e-value ≤ 1e-5) against each *de novo* assembly using the human PRDM9 protein  
600 sequence (without its rapidly evolving zinc finger array) as a query, and we classified the domain  
601 presence of up to five top hits using CDD blast [55]. For a given species, if the KRAB and SET  
602 domains were not identified in any transcript, *PRDM9* was considered incomplete. The inability to



603 identify PRDM9 could indicate either that the gene is not expressed or that we lack the appropriate  
604 cell types or sequence coverage to detect it. To assess our power to detect PRDM9 from the  
605 testis RNA-seq data, we followed methods outlined in [11]. Specifically, for each transcriptome,  
606 we evaluated whether we could identify transcripts from six genes with highly conserved roles in  
607 meiotic recombination [62] (*HORMAD1*, *MEI4*, *MRE11A*, *RAD50*, *REC114*, and *SPO11*). To  
608 identify the transcripts orthologous to each of these genes, we performed a *tblastn* search (e-  
609 value  $\leq 1e-5$ ) of the *Homo sapiens* reference protein sequence against each *de novo*  
610 transcriptome. We considered PRDM9 to be absent if we detected expression of all six genes but  
611 not a complete *PRDM9*; by these criteria, we found PRDM9 to be missing from *A. carolinensis*,  
612 *S. undulatus*, and *A. mexicanus*.

613 Using the same approach to *de novo* assembly and gene detection, we also analyzed  
614 publicly available RNA-seq datasets from testis for 28 additional species (**Table S3**), either to  
615 verify the absence of PRDM9 (see above) or of one of the candidate genes (see below).

616 To estimate the expression levels of the Trinity-reconstructed transcripts, we used RSEM  
617 [63] (v1.3.1) implemented through Trinity (v2.8.5). We first aligned the RNA-seq reads from each  
618 sample to the newly generated *de novo* assembled transcriptome (see above) using the alignment  
619 method bowtie [64] (v1.2.2). We then extracted quantification information for each gene of interest  
620 from the RSEM output (in fragments per kilobase of transcript per million mapped reads or FPKM)  
621 (**Fig. S3**).

622

### 623 3. Choice of candidate genes and orthology assignments

624 To identify a set of genes that may co-evolve with *PRDM9*, we relied on three publicly  
625 available datasets, namely: (i) 39 genes associated with variation in recombination phenotypes in  
626 a genome-wide association study in humans [33]. Of the variants reported to be associated with  
627 recombination phenotypes, six were found in intergenic regions; we included the subset of two  
628 cases in which the authors assigned these variants to nearby genes (*ZNF84* and *ZNF140*). (ii)  
629 193 genes co-expressed with PRDM9 in single cell data from mouse testes. Specifically, we  
630 considered the top 1% of genes based on their gene expression loadings in component 5, the  
631 component in which PRDM9 has the highest loading [31]. (iii) 36 genes known to have a role in  
632 mammalian meiotic recombination based on functional studies [32].

633 Genes co-expressed with PRDM9 in mouse spermatogenesis were converted to human  
634 gene symbols using the package biomaRt in R [65]. Fifteen of these genes did not have an  
635 orthologous human gene symbol (*Gm7972*, *H2-K1*, *Gm4349*, *Ddx43*, *Atad2*, *Xlr4c*, *Gm364*,

636 *Tex16*, *4933427D06Rik*, *AI481877*, *H2-D1*, *Trap1a*, *Xlr4a*, *2310035C23Rik*, and *Tmem5*) and  
637 eight other genes mapped to more than one human gene symbol (*Msh5*, *Cbwd1*, *Nxf2*, *Cbwd1*,  
638 *Fam90a1b*, *Srgap2*, *Cdk11b*, *Gm15262*). Keeping all mapped gene symbols yielded 185 genes;  
639 combined with the two other sources, 241 genes were tested for their co-evolution with *PRDM9*  
640 (**Figure S6**). A supplementary file describing each meiosis candidate gene is available in **Table**  
641 **S5**.

642 For the 241 genes, we characterized whether the ortholog is present in its complete form  
643 across vertebrate species. To this end, we first downloaded all the vertebrate RefSeq protein  
644 sequences available on the NCBI database (accessed on June 3, 2020), corresponding to 339  
645 species. Of these, we filtered out 32 species that were missing 10 or more BUSCO core genes  
646 (out of a total of 255 genes) [66], reasoning that their genomes were sufficiently incomplete that  
647 they may be missing orthologs by chance (see **Figure S7**). Of the remaining 307 species, we  
648 further excluded 29 species in order to remove polytomies observed in the phylogeny; specifically,  
649 we removed the minimal number of species necessary to remove each polytomy while preserving  
650 any transitions in the state of *PRDM9*. Moreover, to minimize possible phylogenetic signals  
651 generated by genome assembly quality, we thinned the tree such that for each *PRDM9* loss along  
652 the phylogeny, we kept at most three species representing that loss. In cases where a loss was  
653 ancestral to more than three species in our dataset, we picked three distantly related species with  
654 the best genome assemblies, as measured by the BUSCO score. In the end, we retained 189  
655 species: 134 mammals, 3 birds, 6 amphibians, 18 reptiles, 2 percomorph fish, 3 cypriniformes  
656 fish, 20 other ray-finned fish, 2 cartilaginous fish, and one jawless fish. This phylogeny includes  
657 representative species for 11 of the 13 inferred *PRDM9* losses: species of *Bufo* frogs and  
658 salamanders were not included due to the absence of available gene annotations; also due to the  
659 lack of gene annotations for frog species with *PRDM9*, within these 189 species, the losses in  
660 *Xenopus* and *Dicroglossidae* frogs cannot be distinguished from a single event.

661 For each candidate gene in each species, we performed a blastp search of the human  
662 ortholog against the RefSeq database of the species and kept up to five top hits obtained at an  
663 e-value threshold of  $1e-5$ . We inferred the domain structure of each hit using the Batch CD-Search  
664 [67], and considered a domain as present in a species if the e-value was  $\leq 0.1$ . We considered  
665 genes to be complete orthologs if they contained the superfamily domains found in four  
666 representative species of the vertebrates phylogeny carrying a complete *PRDM9* (*Esox lucius*  
667 (fish) *Geotrypetes seraphini* (caecilian), and *Pseudonaja textilis* (snake)), at an e-value threshold  
668 of  $1e-4$ . For the 15 genes (*FANCB*, *FMR1NB*, *GPR137C*, *HAUS8*, *M1AP*, *MEI1*, *SPATA22*,

669 *CLSPN, FBXO47, HMGA2, HSF2BP, IQCB1, LRRC42, PRAME, SYCE2*) in which no detectable  
670 domains were present, we annotated the presence or absence of the gene using the blastp results  
671 alone. In the end, we built a matrix of presence or absence across species and candidate genes  
672 to be used in the phylogenetic test (see **Table S6**).

673

#### 674 **4. Testing for the co-evolution of *PRDM9* and candidate genes**

675 To test for the co-evolution of *PRDM9* and each candidate gene, we need to account for  
676 the phylogenetic relationships among the species considered. To obtain these relationships and  
677 time-calibrated branch lengths, we used the TimeTree resource (<http://timetree.org/>; [35],  
678 accessed on June 10, 2020). Of the 189 species included in the phylogenetic tests, 9 were not  
679 present in the TimeTree database; in those cases, we used information from a close evolutionary  
680 relative to determine their placement and branch lengths.

681 For this test, we consider *PRDM9* as present if it contains KRAB and SET domains or  
682 incomplete/missing if one of those domains is absent (**Tables S4** and **S8**). We do not rely on the  
683 SSXRD domain when making these calls because its short length makes its detection at a given  
684 e-value threshold unreliable. Notably, for 19 of the 26 species with *PRDM9* orthologs containing  
685 KRAB and SET domains, but not SSXRD domains with an e-value < 1, we are able to detect the  
686 SSXRD domain when using an e-value threshold of 1000 (**Table S1**). We additionally do not rely  
687 on the ZF array because its repetitive nature makes it difficult to sequence reliably.

688 We tested whether state changes of intact candidate genes were unexpectedly coincident  
689 with state changes of the intact *PRDM9* using the software *BayesTraitsV3* [68]. We did so by  
690 comparing the statistical support for two models: a null model in which *PRDM9* and a given  
691 candidate gene evolve independently of one another along the phylogeny versus an alternative  
692 model in which the gain ("1") and loss ("0") of a gene is dependent on the status of *PRDM9* and  
693 vice versa. We compared the likelihoods of the two models using a likelihood ratio test with 4  
694 degrees of freedom, and reported a p-value uncorrected for multiple tests (**Table S7**). For each  
695 gene and model, 100 maximum likelihood tries were computed and the maximum likelihood value  
696 was retained. A quantile-quantile plot was drawn to assess the distribution of p-value, and the R  
697 package "Haplin" was used to compute pointwise confidence intervals (CI). To control for the false  
698 discovery rate (FDR), we computed q-values using the R package "qvalue" and set a 50% FDR  
699 threshold.

700 Given the phylogenetic distribution of *PRDM9*, it is likely that a *PRDM9* ortholog was  
701 present in the common ancestor of vertebrates [11,12]. Based on this prior knowledge, we  
702 restricted the state of *PRDM9* at the root of the phylogeny to always be present. In turn, for each

703 candidate gene, we set a prior in which it had 50% probability of being present and 50% probability  
704 of being absent. We also used this prior for the state of *PRDM9* in the 9 species that lack *PRDM9*  
705 but where the loss was not supported by a closely related species (i.e., for which we considered  
706 the status uncertain).

707 For *FBXO47*, *TEX15*, *ZCWPW1* and *ZCWPW2*, we also explored restrictions on the rates  
708 in the dependent model, such that their state transitions depend on *PRDM9* (model X) or the state  
709 transitions of *PRDM9* depends on theirs (model Y), rather than both being true. For these tests,  
710 we compared the likelihoods of each dependent model against our independent null model using  
711 a likelihood ratio test with 2 degrees of freedom. For each gene and model, 100 maximum  
712 likelihood tries were computed and the maximum likelihood value was retained.

713 We also explored whether redefining a complete *PRDM9* ortholog as containing not only  
714 the KRAB and SET domain but also the SSXRD domain would change the statistical significance.  
715 By using the improved calls (see below), only *ZCWPW2* remains significant ( $p=0.004$ ) and  
716 *ZCWPW1* marginally so ( $p=0.056$ ) (**Table S9B-C**).

717

## 718 5. Improving gene status calls of top candidate genes

719 For the five genes with a FDR  $\leq 50\%$  (**Figure 2A**), we sought to improve our calls by  
720 building phylogenetic trees based on domains in the genes and examining the clustering patterns  
721 visually, as well as by searching for orthologs in whole genome assemblies and testis  
722 transcriptomes (following the same procedures described for *PRDM9*). These improved calls  
723 were then used to rerun the phylogenetic independent contrast tests, following the same  
724 implementation as previously; the p-values for these improved gene models are shown alongside  
725 the original ones in **Table 1**. Below we provide an overview of the steps we took for each  
726 candidate gene. For each gene we provide descriptions of identified orthologs and how they were  
727 identified in **Table S1**, specific details about orthologs identified from whole genome assemblies  
728 in **Table S2**, our improved calls per species in **Table S8A**, and a summary of loss events in **Table**  
729 **S8B**.

730

### 731 i. *MEI1*

732 For *MEI1*, an initial blastp search of the vertebrate RefSeq database using the human  
733 sequence as query resulted in the identification of 422 *MEI* orthologs from 372 species. We note  
734 that, for *MEI1*, we did not find any domain annotations, and therefore did not perform phylogenetic  
735 analysis to support the identification of these orthologs. However, each homolog identified in our  
736 initial RefSeq analysis was annotated as either *MEI1* or *MEI1-like*. We thus labeled each species

737 as having a complete ortholog if an ortholog was present. This approach resulted in the  
738 identification of *MEI1* ortholog for 187 of the 189 species used for our co-evolutionary test. For  
739 the remaining 2 species, we sought to identify *MEI1* orthologs from whole genome sequences  
740 following the same procedures described for *PRDM9*. This approach allowed us to identify a *MEI1*  
741 ortholog in every species, revealing that in fact, *MEI1* has not been lost among the vertebrate  
742 species examined (**Tables S1 and S2**).

743

#### 744 ii. *ZCWPW1* and *ZCWPW2*

745 Because *ZCWPW1* and *ZCWPW2* are paralogs, we performed our analyses of these  
746 genes together. To this end, we combined the datasets of genes identified in our initial RefSeq  
747 blastp search to create a dataset of 977 putative orthologs from 363 species. We then extracted  
748 amino acid sequences and built neighbor-joining trees using Clustal Omega for both the zf-CW  
749 and PWWP domains ([56]; accessions cl06504 and cl02554; **Figure S9A-B**). Utilizing these trees,  
750 we removed 573 genes that visually clustered with genes annotated as distantly related paralogs,  
751 such as members of the MORC and NSD gene families. We additionally relied on these trees to  
752 more confidently label which genes were *ZCWPW1* orthologs and which were *ZCWPW2*  
753 orthologs based on where they clustered in the tree. We considered orthologs as complete if they  
754 contain both PWWP and zf-CW domains with e-values < 1. This approach resulted in the  
755 identification of 193 complete *ZCWPW1* orthologs from 188 species, and 187 complete *ZCWPW2*  
756 orthologs from 180 species.

757 Among the 189 species used in our co-evolutionary test, 164 had complete *ZCWPW1*  
758 orthologs and 154 had complete *ZCWPW2* orthologs on the basis of this initial search. For the 25  
759 species missing a complete *ZCWPW1* ortholog, and for the 35 missing a complete *ZCWPW2*  
760 ortholog, we sought to identify the orthologs from whole genome sequences following the same  
761 procedures as described for *PRDM9*. This approach enabled us to identify an additional 3  
762 complete *ZCWPW1* orthologs from 3 species, and an additional 11 complete *ZCWPW2* orthologs  
763 from 11 species (**Tables S1 and S2**). For the remaining species, we checked the putative loss of  
764 *ZCWPW1* or *ZCWPW2* using RNA-seq data when available, which led to the identification of an  
765 additional 2 complete *ZCWPW1* orthologs, but no additional *ZCWPW2* orthologs (**Tables S1 and**  
766 **S3**). We additionally added one *ZCWPW1* ortholog from the common shrew (*Sorex araneus*) from  
767 the Ensemble database, which had been identified previously but was absent from NCBI [26,27].  
768 Lastly, we sought to identify *ZCWPW2* from the whole genome sequence of a species of frog with  
769 *PRDM9* (*Ranitomeya imitator*) not otherwise included in our co-evolutionary test in order to  
770 distinguish whether or not the absence of *ZCWPW2* in *Xenopus* and *Dicroglossidae* frogs



771 corresponded to a single loss or multiple events. We were able to identify *ZCWPW2* from this  
772 species, suggesting that *ZCWPW2* has been lost multiple times within frogs (**Tables S1, S2 and**  
773 **S8**).

774

### 775 **iii. *TEX15***

776 For *TEX15*, our initial blastp search resulted in the identification of 900 putative orthologs  
777 from 363 species. We similarly utilized a tree built using the DUF3715 domain to remove 667  
778 genes that cluster with distantly related paralogs, in particular, *TASOR* and *TASOR2* (**Figure**  
779 **S9C**). When making our final calls about *TEX15* orthologs, we labeled them as complete if they  
780 contained both DUF3715 and *TEX15* domains (accessions pfam12509 and pfam15326). This  
781 approach resulted in the identification of 179 complete *TEX15* orthologs from 175 species. Among  
782 the 189 species used for our co-evolutionary test, 150 had complete *TEX15* orthologs on the  
783 basis of this initial search. For the 39 species missing a complete *TEX15* ortholog, we sought to  
784 identify the orthologs from whole genome sequences, following the same procedures as  
785 described for *PRDM9*. In this way, we identified an additional 29 complete *TEX15* orthologs from  
786 28 species (**Table S2**). For the remaining species, we checked if we could find *TEX15* using RNA-  
787 seq data, when available, and found one additional complete *TEX15* ortholog by this approach  
788 (**Tables S1 and S3**).

789

### 790 **iv. *FBXO47***

791 For *FBXO47*, an initial blastp search of the vertebrate RefSeq database using the human  
792 sequence as query resulted in the identification of 386 putative *FBXO47* orthologs from 380  
793 species. We did not perform phylogenetic analysis to support the identification of these orthologs:  
794 While we detected a domain (F-BOX) in the human *FBXO47* gene, due to its high e-value in  
795 humans (e-value = 0.01), we did not rely on its presence or absence when inferring the whether  
796 or not a complete *FBXO47* gene was present in each species. However, each homolog identified  
797 in our initial RefSeq analysis was annotated as either *FBXO47* or *FBXO47*-like with the exception  
798 of one *CWC25* gene, which was removed. We thus labeled each species as having a complete  
799 ortholog if an ortholog was present. This approach resulted in the identification of *FBXO47*  
800 ortholog for 181 of the 189 species used for our co-evolutionary test. For the remaining 8 species,  
801 we sought to identify *FBXO47* orthologs from whole genome sequences and/or RNA-seq datasets  
802 following the same procedures described for *PRDM9*; however, we were unable to identify any  
803 additional *FBXO47* in this way (**Tables S1 and S3**).

804

## 805 **6. Conservation of residues in ZCWPW2**

806 We carried out a residue conservation analysis using an approach proposed by [69], using  
807 code *score\_conservation.py* available at <https://compbio.cs.princeton.edu/conservation/>. This  
808 approach quantifies the Jensen–Shannon divergence between the amino acid distribution of the  
809 focal residue and a “background amino acid distribution.” The alignment of *ZCWPW2* was  
810 produced using Clustal Omega (using default parameters) within MEGA (version 7, [35,70]). As  
811 recommended, the overall background amino acid distribution was drawn based on the  
812 BLOSUM62 amino acid substitution matrix provided by the software [69]. Any column of the gene  
813 sequence alignment with more than 30% gaps was ignored. A window size of 3 was used to  
814 incorporate information from sequential amino acids, as recommended by the default settings.

815

## 816 **7. Evidence for relaxed selective constraint in the absence of PRDM9**

817 To test for possible relaxed selection in species without a complete *PRDM9*, we used the  
818 program *codeml* within PAML [71,72]. *Codeml* uses protein coding sequences to estimate the  
819 ratio of non-synonymous to synonymous substitution rates ( $\omega = d_N/d_S$ ). Values of  $\omega$  significantly  
820 less than 1 are indicative of purifying selection, i.e., of the functional importance of the gene.

821 To this end, we considered each major clade (fish, mammals, reptiles, amphibians)  
822 separately and extracted and aligned coding nucleotide sequences from NCBI for multiple  
823 species. We aligned those sequences in a codon-aware manner using Clustal Omega (using  
824 default parameters) within MEGA (version 7, [35,70]) and inspected the codon-aware alignment  
825 visually to ensure that the same isoforms were used across species. For each multi-species  
826 alignment, we tried two approaches: (i) We estimated  $\omega$  under a null model assuming the same  
827  $\omega$  across all branches and an alternative model in which there are two  $\omega$  allowed: one  $\omega$  value in  
828 species with a complete *PRDM9* and a second  $\omega$  for the branches in which *PRDM9* is absent or  
829 incomplete (including the internal branches on which *PRDM9* may have been lost); (ii) We  
830 considered the same null model with the same  $\omega$  across all branches; and an alternative model  
831 with one  $\omega$  value in species with a complete *PRDM9*, a second  $\omega$  for the branches in which  
832 *PRDM9* is absent or incomplete and additional  $\omega$  values for each branch on which *PRDM9* was  
833 inferred to be lost (a different one for each independent loss, as the  $\omega$  value averaged over the  
834 branch will depend on when along the branch *PRDM9* was lost). For (i), significance was  
835 assessed using a likelihood ratio test with 1 degree of freedom; for (ii), by the number of degrees  
836 of freedom corresponded to the number of distinct  $\omega$  values minus 1. If  $\omega$  values were found to  
837 be significantly higher in species without a complete *PRDM9*, we tested whether or not we could  
838 reject  $\omega = 1$  for these species. For two cases in which we could not obtain a multi-species

839 alignment that included the whole coding sequence (*ZCWPW1* in fish and *TEX15* in amphibians),  
840 we instead used the pairwise model (runmode: -2 within PAML) on alignments for a pair of  
841 species, and tested whether we could reject  $\omega = 1$  for species lacking *PRDM9* by comparing a  
842 model allowing  $\omega$  to vary versus a null model fixing the  $\omega$  value at 1, with 1 degree of freedom.

843

844

845

846

847

848

849

850

851

852

853

854

855

856

857

858

859

860

861

862

863

864

865

866

867

868

869

## 870 Figures

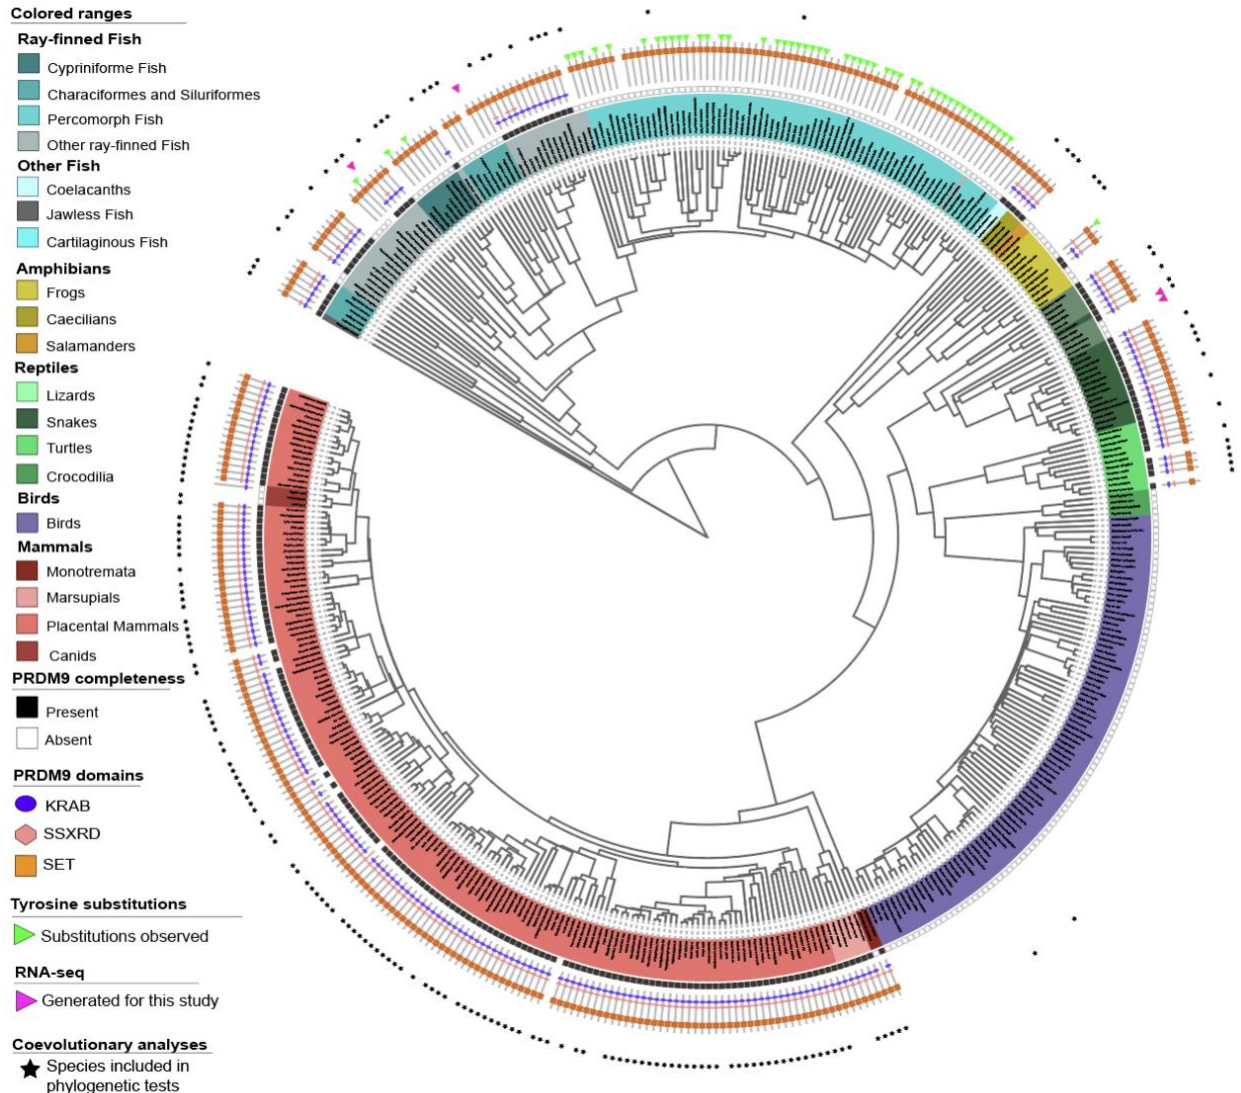

871  
872 **Figure 1. The phylogenetic distribution of PRDM9 and its domain architecture across**  
873 **vertebrates.** The inferred *PRDM9* status of 432 vertebrate species. Branch lengths were  
874 computed based on the TimeTree database. For 28 species not present in the database, we used  
875 branch length information from a close evolutionary relative; for 14 species in which we made  
876 *PRDM9* calls, we were unable to find such a substitute, so they are not represented. Different  
877 vertebrate clades are indicated by colored segments, with salmon for mammals, cyan for fish,  
878 mustard for amphibians, green for reptiles, and purple for birds. In the inner circle, squares  
879 indicate whether *PRDM9* is complete (filled black) or incomplete/absent (empty black); for species  
880 with an uncertain *PRDM9* status, no box is shown. The *PRDM9* domain architecture of each  
881 species is shown with a cartoon, where the presence of a KRAB domain is indicated in blue, of  
882 SSXRD in pink, and of the SET domain in orange. Green triangles indicate species that only carry  
883 *PRDM9* orthologs with substitutions at putatively important catalytic residues in the SET domain

884 (see **Table S4**). The tree was drawn using itool (<https://itol.embl.de/>); an interactive version is  
885 available at <https://itol.embl.de/shared/izabelcavassim>.

886  
887  
888  
889  
890  
891  
892  
893

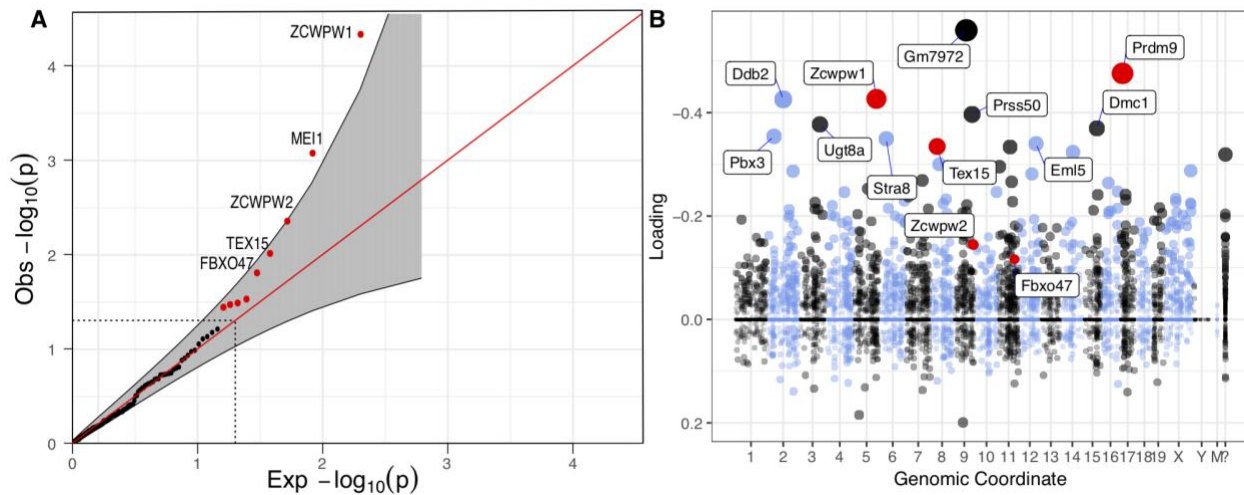

894  
895

896 **Figure 2. Phylogenetic tests and genes co-expressed with PRDM9 in single cell mouse**  
897 **testes data (A)** Quantile-Quantile plot of the p-values obtained from the phylogenetic tests run  
898 on 139 genes that appeared to have been lost at least once in the 189 vertebrate species  
899 considered. Genes that are significant at the 5% level are shown in red (outside the dashed lines)  
900 and a pointwise 95% confidence interval is shown in grey. Genes with a FDR  $\leq$  50% are  
901 annotated. **(B)** Loadings for one of 46 components (component 5) inferred from single cell  
902 expression data in mouse testes [31], in which PRDM9 is most highly expressed. The dot sizes  
903 are proportional to the square of the absolute value of the loading. PRDM9 and the three genes  
904 identified in our phylogenetic tests with  $p < 0.05$  are shown in red. Mouse genomic coordinates are  
905 displayed. Panel B was made from summary statistics provided by [31], using SDAtools  
906 (<https://github.com/marchinilab/SDAtools/>).

907  
908  
909  
910



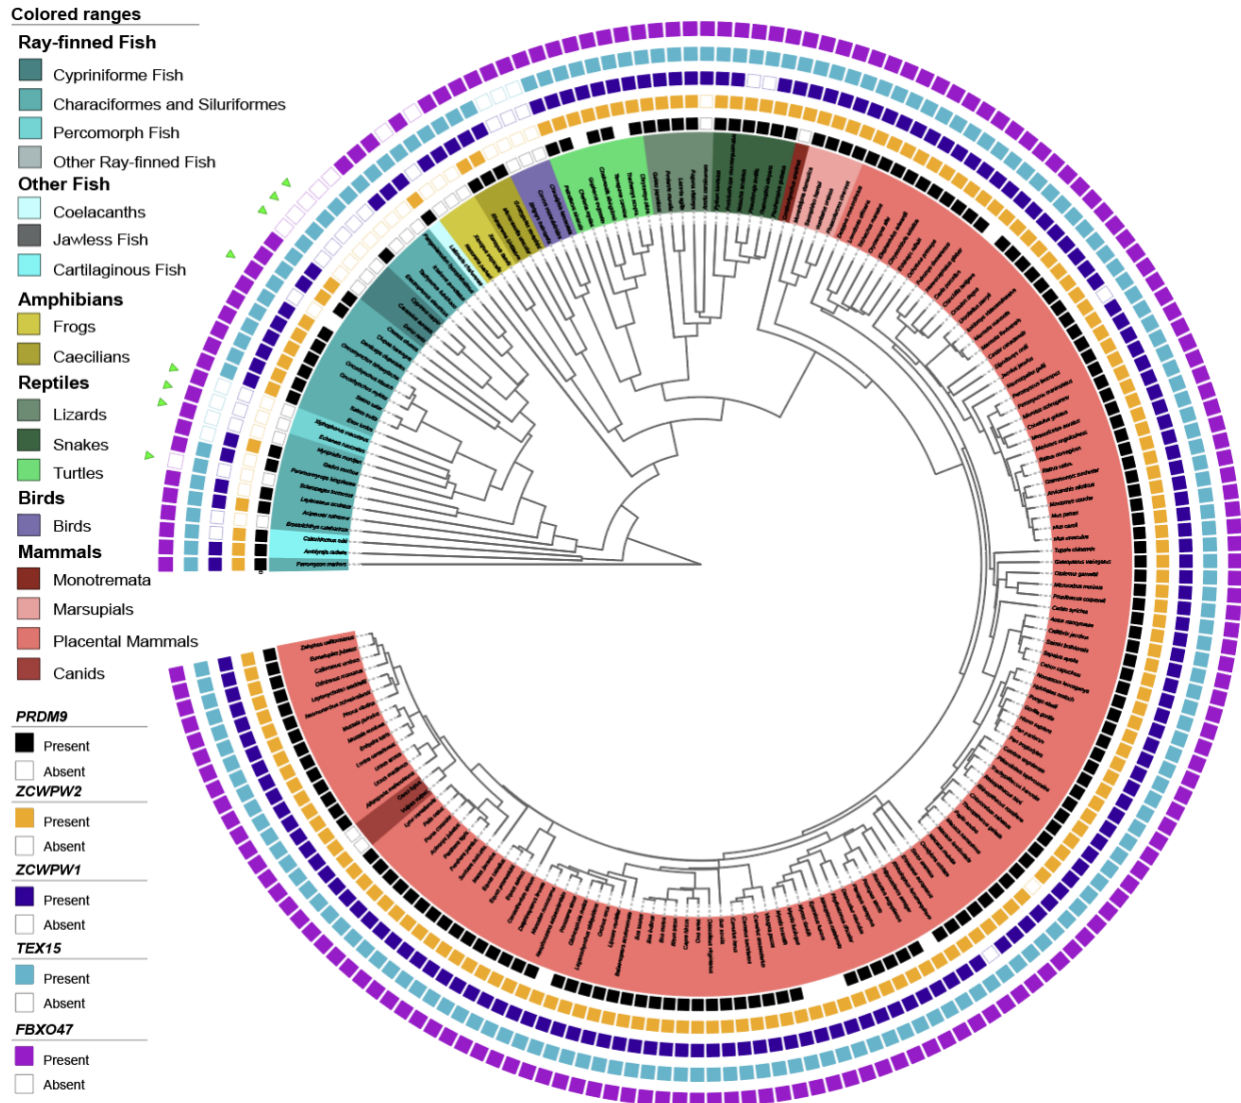

911  
 912  
 913 **Figure 3. The phylogenetic distribution of *PRDM9* and co-evolving genes across 189**  
 914 **species.** Filled teal and empty teal squares indicate whether *PRDM9* is present or absent,  
 915 respectively (see Methods). If nothing is indicated, the status of *PRDM9* is uncertain. Likewise,  
 916 filled orange and empty orange squares indicate whether *ZCWPW2* is present or absent/incomplete;  
 917 filled and empty navy squares indicate whether *ZCWPW1* is present or absent/incomplete; filled  
 918 and empty light blue squares indicate whether *TEX15* is present or absent/incomplete; and filled  
 919 and empty light purple squares indicate whether *FBXO47* is present or absent/incomplete. Green  
 920 triangles indicate species that only carry *PRDM9* orthologs with substitutions at putatively  
 921 important catalytic residues in the SET domain (see **Table S4**). The status of candidate genes  
 922 (for which FDR  $\leq$  50%; Figure 2A) was re-evaluated based on a search of gene models within  
 923 whole genome sequences (see Methods); updated p-values for the phylogenetic test are shown

924 in Table 1. The tree was drawn using itool (<https://itol.embl.de/>); an interactive version is available  
 925 at <https://itol.embl.de/shared/izabelcavassim>.

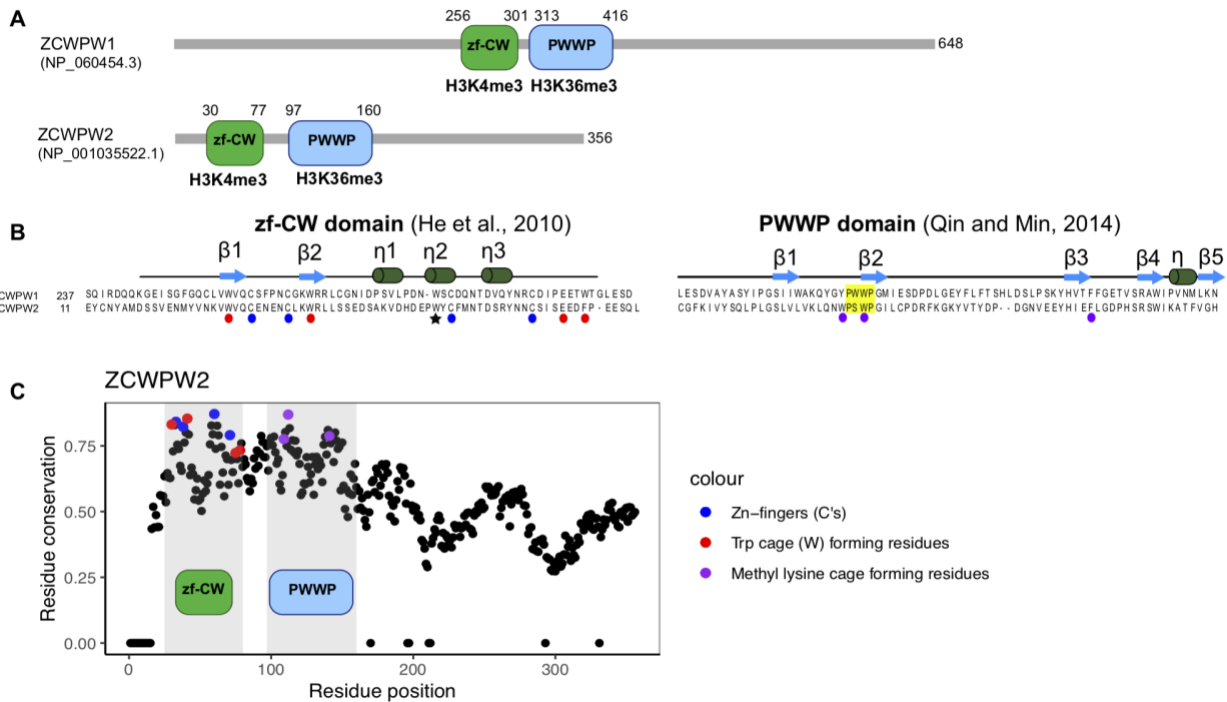

926  
 927  
 928 **Figure 4. Domain architecture and conservation of ZCWPW1 and ZCWPW2.** (A) Amino acid  
 929 sequence and domain structure composition of genes ZCWPW1 and ZCWPW2 in humans. (B)  
 930 The ZF-CW domain structure includes the fingers (residues indicated by blue circles) and an  
 931 aromatic cage (red) expected to bind to H3K4me3 [73], and the star indicates the third Trp residue  
 932 that is thought to stabilize the fold by hydrophobic interactions [73]. The PWWP domain (yellow)  
 933 is expected to bind to histone H3K36me3 through a hydrophobic cavity composed of three  
 934 aromatic residues (purple) [74]. The secondary structures of zf-CW and PWWP domains are  
 935 represented above sequences. (C) Conservation of residues in ZCWPW2 across vertebrates,  
 936 with those residues recognizing modifications on the histone tail colored in blue, red and purple.  
 937 Positions in the ZCWPW2 alignment with > 30% of gaps were ignored and the conservation score  
 938 was set to 0.

939  
 940  
 941  
 942  
 943  
 944  
 945  
 946  
 947  
 948

949  
950  
951  
952  
953  
954  
955  
956  
957  
958  
959  
960  
961  
962

## Tables

**Table 1. Results of phylogenetic tests**

We focused on the five genes that had a false discovery rate (FDR)  $\leq 50\%$ , improved the ortholog status calls, and reran the phylogenetic tests for four of them (all but *MEI1*, which turned out to be present in all species considered; see Methods). Gene source refers to the criterion by which the gene was originally included among our lists of candidates: (1) It is co-expressed with PRDM9 in single cell mouse testes data [31] or (2) variants assigned to the gene are associated with variation in recombination phenotypes in humans [33] or (3) the gene was previously known to have a role in mammalian meiotic recombination from functional studies [32] (see Methods).

| Gene          | Position (human coordinate) | Gene source | LogLik H0 | LogLik Ha | P-value   | FDR    | P-value for improved status calls |
|---------------|-----------------------------|-------------|-----------|-----------|-----------|--------|-----------------------------------|
| <i>ZCWPW1</i> | chr7:<br>1<br>00400826      | 1           | -65.941   | -53.35647 | 4.651e-05 | 0.0064 | 1.948e-03                         |
| <i>MEI1</i>   | chr22:<br>4<br>1699503      | 3,1         | -54.200   | -44.779   | 8.442e-04 | 0.0586 | NA                                |
| <i>ZCWPW2</i> | chr3:<br>2834872<br>1       | 1           | -67.711   | -60.146   | 4.437e-03 | 0.2055 | 5.171e-06                         |
| <i>TEX15</i>  | chr8:<br>3<br>0831544       | 1           | -138.430  | -131.764  | 9.760e-03 | 0.3391 | 8.682e-02                         |
| <i>FBXO47</i> | chr17:<br>3893643<br>2      | 2           | -53.678   | -47.559   | 1.566e-02 | 0.4354 | 1.566e-02                         |

963  
964  
965  
966  
967  
968

## 969 Acknowledgments

970 The authors would like to thank Arild Folkvord and Leif Andersson (*Clupea harengus*), Cliff Tabin  
971 (*Astyanax mexicanus*), Tonia Schwartz, and Tracy Langkilde (*Sceloporus undulatus*), and  
972 Athanasia Tzika (*Anolis carolinensis*) for providing testis, muscles, and liver samples, and  
973 Mackenzie Keegan for extraction and library preparation of samples. The authors are also grateful  
974 to Andres Bendesky for use of his lab space and sequencing facilities and to Andrew Meade for  
975 helpful discussions about the software *Bayestraits*. In addition, we thank Todd Jackman and  
976 Daniel Wells for pointing out mistakes in the previous version of our manuscript, now corrected.

977

## 978 Data and Code availability

979 The following data sets were generated

### 980 1. RNA-seq data for two fish species and two reptile species (fastq files)

981 Cavassim M I A, Baker Z, Hoge C, Schierup M, Schumer M and Przeworski M (2020)

982 Available from the NCBI BioProject (accession number: PRJNA605699).

### 983 2. Code availability Code generated for this study can be found at

984 [https://github.com/izabelcavassim/PRDM9\\_analyses](https://github.com/izabelcavassim/PRDM9_analyses)

### 985 3. Supplementary material

986 Supplementary material is available on

987 <https://www.dropbox.com/sh/pihq6a643fz21js/AAANGJWpALT42MCrrsJdlSUHa?dl=0>

988

## 989 Author contributions

990 **Conceptualization:** M.I.A.C., Z.B., and M.P.; **Methodology:** M.I.A.C., Z.B., C.H., M.S., and M.P.;

991 **Formal Analysis:** M.I.A.C., Z.B.; **Investigation:** M.I.A.C., Z.B., C.H., M.S.; **Resources:** M.H.S.,

992 M.S., M.P.; **Data curation:** M.I.A.C., Z.B., M.S., and M.P.; **Writing - Original Draft:** M.I.A.C.

993 Z.B., M.S., and M.P. **Writing - Review and Editing:** M.I.A.C., Z.B., C.H., M.S., and M.P.;

994 **Visualization:** M.I.A.C. and Z.B. **Supervision:** M.H.S., M.S., and M.P. **Project administration:**

995 M.P.; **Funding acquisition:** M.H.S., M.S., and M.P.

996

## 997 Funding information

998 This work was partly supported by R01 GM83098 to M.P. and NIH 1R35GM133774 to M.S. The

999 funders had no role in study design, data collection and interpretation, or the decision to submit

1000 the work for publication.

1001

## 1002 Competing interest

1003 The authors declare that they have no competing interests.

1004

1005

## 1006 **References**

- 1007 1. Keeney S, Neale MJ. Initiation of meiotic recombination by formation of DNA double-strand  
1008 breaks: mechanism and regulation. *Biochem Soc Trans.* 2006;34: 523–525.
- 1009 2. Baudat F, Buard J, Grey C, Fledel-Alon A, Ober C, Przeworski M, et al. PRDM9 is a major  
1010 determinant of meiotic recombination hotspots in humans and mice. *Science.* 2010;327:  
1011 836–840.
- 1012 3. Myers S, Bowden R, Tumian A, Bontrop RE, Freeman C, MacFie TS, et al. Drive against  
1013 hotspot motifs in primates implicates the PRDM9 gene in meiotic recombination. *Science.*  
1014 2010;327: 876–879.
- 1015 4. Parvanov ED, Petkov PM, Paigen K. Prdm9 controls activation of mammalian  
1016 recombination hotspots. *Science.* 2010;327: 835.
- 1017 5. Altemose N, Noor N, Bitoun E, Tumian A, Imbeault M, Chapman JR, et al. A map of human  
1018 PRDM9 binding provides evidence for novel behaviors of PRDM9 and other zinc-finger  
1019 proteins in meiosis. *Elife.* 2017;6. doi:10.7554/eLife.28383
- 1020 6. Spence JP, Song YS. Inference and analysis of population-specific fine-scale  
1021 recombination maps across 26 diverse human populations. *Sci Adv.* 2019;5: eaaw9206.
- 1022 7. Jin X, Fudenberg G, Pollard KS. Genome-wide variability in recombination activity is  
1023 associated with meiotic chromatin organization. doi:10.1101/2021.01.06.425599
- 1024 8. Eram MS, Bustos SP, Lima-Fernandes E, Siarheyeva A, Senisterra G, Hajian T, et al.  
1025 Trimethylation of histone H3 lysine 36 by human methyltransferase PRDM9 protein. *J Biol*  
1026 *Chem.* 2014;289: 12177–12188.
- 1027 9. Powers NR, Parvanov ED, Baker CL, Walker M, Petkov PM, Paigen K. The Meiotic  
1028 Recombination Activator PRDM9 Trimethylates Both H3K36 and H3K4 at Recombination  
1029 Hotspots In Vivo. *PLoS Genet.* 2016;12: e1006146.
- 1030 10. Diagouraga B, Clément JAJ, Duret L, Kadlec J, de Massy B, Baudat F. PRDM9  
1031 Methyltransferase Activity Is Essential for Meiotic DNA Double-Strand Break Formation at  
1032 Its Binding Sites. *Mol Cell.* 2018;69: 853–865.e6.
- 1033 11. Baker Z, Schumer M, Haba Y, Bashkirova L, Holland C, Rosenthal GG, et al. Repeated  
1034 losses of PRDM9-directed recombination despite the conservation of PRDM9 across  
1035 vertebrates. *Elife.* 2017;6. doi:10.7554/eLife.24133
- 1036 12. Oliver PL, Goodstadt L, Bayes JJ, Birtle Z, Roach KC, Phadnis N, et al. Accelerated  
1037 evolution of the Prdm9 speciation gene across diverse metazoan taxa. *PLoS Genet.*  
1038 2009;5: e1000753.
- 1039 13. Axelsson E, Webster MT, Ratnakumar A, LUPA Consortium, Ponting CP, Lindblad-Toh K.  
1040 Death of PRDM9 coincides with stabilization of the recombination landscape in the dog  
1041 genome. *Genome Res.* 2012;22: 51–63.
- 1042 14. Muñoz-Fuentes V, Di Rienzo A, Vilà C. Prdm9, a major determinant of meiotic



- 1043 recombination hotspots, is not functional in dogs and their wild relatives, wolves and  
1044 coyotes. *PLoS One*. 2011;6: e25498.
- 1045 15. Singhal S, Leffler EM, Sannareddy K, Turner I, Venn O, Hooper DM, et al. Stable  
1046 recombination hotspots in birds. *Science*. 2015;350: 928–932.
- 1047 16. Ponting CP. What are the genomic drivers of the rapid evolution of PRDM9? *Trends Genet*.  
1048 2011;27: 165–171.
- 1049 17. Auton A, Rui Li Y, Kidd J, Oliveira K, Nadel J, Holloway JK, et al. Genetic recombination is  
1050 targeted towards gene promoter regions in dogs. *PLoS Genet*. 2013;9: e1003984.
- 1051 18. Brick K, Smagulova F, Khil P, Camerini-Otero RD, Petukhova GV. Genetic recombination is  
1052 directed away from functional genomic elements in mice. *Nature*. 2012;485: 642–645.
- 1053 19. Narasimhan M, Payne C, Caldas S, Beard JR, Kennedy CE. Ageing and healthy sexuality  
1054 among women living with HIV. *Reprod Health Matters*. 2016;24: 43–51.
- 1055 20. Úbeda F, Wilkins JF. The Red Queen theory of recombination hotspots. *Journal of*  
1056 *Evolutionary Biology*. 2011. pp. 541–553. doi:10.1111/j.1420-9101.2010.02187.x
- 1057 21. Latrille T, Duret L, Lartillot N. The Red Queen model of recombination hot-spot evolution: a  
1058 theoretical investigation. *Philos Trans R Soc Lond B Biol Sci*. 2017;372.  
1059 doi:10.1098/rstb.2016.0463
- 1060 22. Thibault-Sennett S, Yu Q, Smagulova F, Cloutier J, Brick K, Camerini-Otero RD, et al.  
1061 Interrogating the Functions of PRDM9 Domains in Meiosis. *Genetics*. 2018;209: 475–487.
- 1062 23. Imai Y, Baudat F, Taillepierre M, Stanzione M, Toth A, de Massy B. The PRDM9 KRAB  
1063 domain is required for meiosis and involved in protein interactions. *Chromosoma*.  
1064 2017;126: 681–695.
- 1065 24. Schield DR, Pasquesi GIM, Perry BW, Adams RH, Nikolakis ZL, Westfall AK, et al. Snake  
1066 Recombination Landscapes Are Concentrated in Functional Regions despite PRDM9. *Mol*  
1067 *Biol Evol*. 2020;37: 1272–1294.
- 1068 25. Huang T, Yuan S, Gao L, Li M, Yu X, Zhang J, et al. The histone modification reader  
1069 ZCWPW1 links histone methylation to PRDM9-induced double-strand break repair. *Elife*.  
1070 2020;9. doi:10.7554/eLife.53459
- 1071 26. Mahgoub M, Paiano J, Bruno M, Wu W, Pathuri S, Zhang X, et al. Dual histone methyl  
1072 reader ZCWPW1 facilitates repair of meiotic double strand breaks in male mice. *Elife*.  
1073 2020;9. doi:10.7554/eLife.53360
- 1074 27. Wells D, Bitoun E, Moralli D, Zhang G, Hinch A, Jankowska J, et al. ZCWPW1 is recruited  
1075 to recombination hotspots by PRDM9, and is essential for meiotic double strand break  
1076 repair. *Elife*. 2020;9. doi:10.7554/eLife.53392
- 1077 28. Hinch AG, Zhang G, Becker PW, Moralli D, Hinch R, Davies B, et al. Factors influencing  
1078 meiotic recombination revealed by whole-genome sequencing of single sperm. *Science*.  
1079 2019;363. doi:10.1126/science.aau8861
- 1080 29. Davies B, Hatton E, Altemose N, Hussin JG, Pratto F, Zhang G, et al. Re-engineering the

- 1081 zinc fingers of PRDM9 reverses hybrid sterility in mice. *Nature*. 2016;530: 171–176.
- 1082 30. Gregorova S, Gergelits V, Chvatalova I, Bhattacharyya T, Valiskova B, Fotopulosova V, et  
1083 al. Modulation of controlled meiotic chromosome asynapsis overrides hybrid sterility in  
1084 mice. *Elife*. 2018;7. doi:10.7554/eLife.34282
- 1085 31. Jung M, Wells D, Rusch J, Ahmad S, Marchini J, Myers SR, et al. Unified single-cell  
1086 analysis of testis gene regulation and pathology in five mouse strains. *Elife*. 2019;8.  
1087 doi:10.7554/eLife.43966
- 1088 32. Baudat F, Imai Y, de Massy B. Meiotic recombination in mammals: localization and  
1089 regulation. *Nat Rev Genet*. 2013;14: 794–806.
- 1090 33. Halldorsson BV, Palsson G, Stefansson OA, Jonsson H, Hardarson MT, Eggertsson HP, et  
1091 al. Characterizing mutagenic effects of recombination through a sequence-level genetic  
1092 map. *Science*. 2019;363. doi:10.1126/science.aau1043
- 1093 34. O’Leary NA, Wright MW, Brister JR, Ciuffo S, Haddad D, McVeigh R, et al. Reference  
1094 sequence (RefSeq) database at NCBI: current status, taxonomic expansion, and functional  
1095 annotation. *Nucleic Acids Res*. 2016;44: D733–45.
- 1096 35. Kumar S, Stecher G, Suleski M, Hedges SB. TimeTree: A Resource for Timelines,  
1097 Timetrees, and Divergence Times. *Mol Biol Evol*. 2017;34: 1812–1819.
- 1098 36. Barker D, Pagel M. Predicting functional gene links from phylogenetic-statistical analyses of  
1099 whole genomes. *PLoS Comput Biol*. 2005;1: e3.
- 1100 37. Pagel M. Detecting correlated evolution on phylogenies: a general method for the  
1101 comparative analysis of discrete characters. *Proceedings of the Royal Society of London*  
1102 *Series B: Biological Sciences*. 1994;255: 37–45.
- 1103 38. Hua R, Wei H, Liu C, Zhang Y, Liu S, Guo Y, et al. FBXO47 regulates telomere-inner  
1104 nuclear envelope integration by stabilizing TRF2 during meiosis. *Nucleic Acids Res*.  
1105 2019;47: 11755–11770.
- 1106 39. Chen Y, Zheng Y, Gao Y, Lin Z, Yang S, Wang T, et al. Single-cell RNA-seq uncovers  
1107 dynamic processes and critical regulators in mouse spermatogenesis. *Cell Res*. 2018;28:  
1108 879–896.
- 1109 40. Huang T, Yuan S, Gao L, Li M, Yu X, Zhang J, et al. The histone modification reader  
1110 ZCWPW1 links histone methylation to PRDM9-induced double-strand break repair. *Elife*.  
1111 2020;9. doi:10.7554/eLife.53459
- 1112 41. Mahgoub M, Paiano J, Bruno M, Wu W, Pathuri S, Zhang X, et al. Dual histone methyl  
1113 reader ZCWPW1 facilitates repair of meiotic double strand breaks in male mice. *Elife*.  
1114 2020;9. doi:10.7554/eLife.53360
- 1115 42. Wells D, Bitoun E, Moralli D, Zhang G, Hinch A, Jankowska J, et al. ZCWPW1 is recruited  
1116 to recombination hotspots by PRDM9, and is essential for meiotic double strand break  
1117 repair. *Elife*. 2020;9. doi:10.7554/eLife.53392
- 1118 43. Li M, Huang T, Li M-J, Zhang C-X, Yu X-C, Yin Y-Y, et al. The histone modification reader  
1119 ZCWPW1 is required for meiosis prophase I in male but not in female mice. *Sci Adv*.

- 1120 2019;5: eaax1101.
- 1121 44. Wells D, Bitoun E, Moralli D, Zhang G, Hinch A, Jankowska J, et al. ZCWPW1 is recruited  
1122 to recombination hotspots by PRDM9, and is essential for meiotic double strand break  
1123 repair. *Elife*. 2020;9. doi:10.7554/eLife.53392
- 1124 45. Yang F, Eckardt S, Leu NA, McLaughlin KJ, Wang PJ. Mouse TEX15 is essential for DNA  
1125 double-strand break repair and chromosomal synapsis during male meiosis. *J Cell Biol*.  
1126 2008;180: 673–679.
- 1127 46. Acquaviva L, Drogat J, Dehé P-M, de La Roche Saint-André C, Géli V. Spp1 at the  
1128 crossroads of H3K4me3 regulation and meiotic recombination. *Epigenetics*. 2013;8: 355–  
1129 360.
- 1130 47. Tian H, Billings T, Petkov PM. CXXC1 is not essential for normal DNA double-strand break  
1131 formation and meiotic recombination in mouse. *PLOS Genetics*. 2018. p. e1007657.  
1132 doi:10.1371/journal.pgen.1007657
- 1133 48. Yang F, Lan Y, Pandey RR, Homolka D, Berger SL, Pillai RS, et al. TEX15 associates with  
1134 MILI and silences transposable elements in male germ cells. *Genes Dev*. 2020;34: 745–  
1135 750.
- 1136 49. Schöpp T, Zoch A, Berrens RV, Auchynnikava T, Kabayama Y, Vasiliauskaitė L, et al.  
1137 TEX15 is an essential executor of MIWI2-directed transposon DNA methylation and  
1138 silencing. *Nat Commun*. 2020;11: 3739.
- 1139 50. Zamudio N, Barau J, Teissandier A, Walter M, Borsos M, Servant N, et al. DNA methylation  
1140 restrains transposons from adopting a chromatin signature permissive for meiotic  
1141 recombination. *Genes Dev*. 2015;29: 1256–1270.
- 1142 51. Nakayama KI, Nakayama K. Ubiquitin ligases: cell-cycle control and cancer. *Nature*  
1143 *Reviews Cancer*. 2006. pp. 369–381. doi:10.1038/nrc1881
- 1144 52. Rhie A, McCarthy SA, Fedrigo O, Damas J, Formenti G, Koren S, et al. Towards complete  
1145 and error-free genome assemblies of all vertebrate species. *Nature*. 2021;592: 737–746.
- 1146 53. Smith SD, Pennell MW, Dunn CW, Edwards SV. Phylogenetics is the New Genetics (for  
1147 Most of Biodiversity). *Trends in Ecology & Evolution*. 2020. pp. 415–425.  
1148 doi:10.1016/j.tree.2020.01.005
- 1149 54. Koepfli K-P, Paten B, Genome 10K Community of Scientists, O'Brien SJ. The Genome 10K  
1150 Project: a way forward. *Annu Rev Anim Biosci*. 2015;3: 57–111.
- 1151 55. Marchler-Bauer A. CDD: a Conserved Domain Database for protein classification. *Nucleic*  
1152 *Acids Research*. 2004. pp. D192–D196. doi:10.1093/nar/gki069
- 1153 56. Sievers F, Higgins DG. Clustal Omega. *Current Protocols in Bioinformatics*. 2014. pp.  
1154 3.13.1–3.13.16. doi:10.1002/0471250953.bi0313s48
- 1155 57. Birney E, Clamp M, Durbin R. GeneWise and Genomewise. *Genome Res*. 2004;14: 988–  
1156 995.
- 1157 58. Wu H, Mathioudakis N, Diagouraga B, Dong A, Dombrovski L, Baudat F, et al. Molecular

- 1158 basis for the regulation of the H3K4 methyltransferase activity of PRDM9. *Cell Rep.* 2013;5:  
1159 13–20.
- 1160 59. Schmieder R, Edwards R. Fast identification and removal of sequence contamination from  
1161 genomic and metagenomic datasets. *PLoS One.* 2011;6: e17288.
- 1162 60. Grabherr MG, Haas BJ, Yassour M, Levin JZ, Thompson DA, Amit I, et al. Full-length  
1163 transcriptome assembly from RNA-Seq data without a reference genome. *Nat Biotechnol.*  
1164 2011;29: 644–652.
- 1165 61. Macmanes MD. On the optimal trimming of high-throughput mRNA sequence data. *Front*  
1166 *Genet.* 2014;5: 13.
- 1167 62. Lam I, Keeney S. Mechanism and regulation of meiotic recombination initiation. *Cold Spring*  
1168 *Harb Perspect Biol.* 2014;7: a016634.
- 1169 63. Applied Research Applied Research Press. RSEM: Accurate Transcript Quantification from  
1170 RNA-Seq Data with Or Without a Reference Genome. 2015.
- 1171 64. Langmead B, Salzberg SL. Fast gapped-read alignment with Bowtie 2. *Nat Methods.*  
1172 2012;9: 357–359.
- 1173 65. Durinck S, Bullard J, Spellman PT, Dudoit S. GenomeGraphs: integrated genomic data  
1174 visualization with R. *BMC Bioinformatics.* 2009;10: 2.
- 1175 66. Waterhouse RM, Seppey M, Simão FA, Manni M, Ioannidis P, Klioutchnikov G, et al.  
1176 BUSCO Applications from Quality Assessments to Gene Prediction and Phylogenomics.  
1177 *Mol Biol Evol.* 2018;35: 543–548.
- 1178 67. Marchler-Bauer A, Derbyshire MK, Gonzales NR, Lu S, Chitsaz F, Geer LY, et al. CDD:  
1179 NCBI’s conserved domain database. *Nucleic Acids Res.* 2015;43: D222–6.
- 1180 68. Pagel, Pagel, Meade. Bayesian Analysis of Correlated Evolution of Discrete Characters by  
1181 Reversible-Jump Markov Chain Monte Carlo. *The American Naturalist.* 2006. p. 808.  
1182 doi:10.2307/3844739
- 1183 69. Capra JA, Singh M. Predicting functionally important residues from sequence conservation.  
1184 *Bioinformatics.* 2007;23: 1875–1882.
- 1185 70. Kumar S, Stecher G, Tamura K. MEGA7: Molecular Evolutionary Genetics Analysis Version  
1186 7.0 for Bigger Datasets. *Mol Biol Evol.* 2016;33: 1870–1874.
- 1187 71. Yang Z. PAML 4: phylogenetic analysis by maximum likelihood. *Mol Biol Evol.* 2007;24:  
1188 1586–1591.
- 1189 72. Yang Z. PAML: a program package for phylogenetic analysis by maximum likelihood.  
1190 *Bioinformatics.* 1997. pp. 555–556. doi:10.1093/bioinformatics/13.5.555
- 1191 73. He F, Umehara T, Saito K, Harada T, Watanabe S, Yabuki T, et al. Structural insight into  
1192 the zinc finger CW domain as a histone modification reader. *Structure.* 2010;18: 1127–  
1193 1139.
- 1194 74. Qin S, Min J. Structure and function of the nucleosome-binding PWWP domain. *Trends*

1195 Biochem Sci. 2014;39: 536–547.

1196 75. NCBI Resource Coordinators. Database resources of the National Center for Biotechnology  
1197 Information. *Nucleic Acids Res.* 2018;46: D8–D13.

1198 76. Yang Z. PAML: a program package for phylogenetic analysis by maximum likelihood.  
1199 *Bioinformatics.* 1997. pp. 555–556. doi:10.1093/bioinformatics/13.5.555

1200 77. He F, Muto Y, Inoue M, Kigawa T, Shirouzu M, Terada T, et al. Complex structure of the zf-  
1201 CW domain and the H3K4me3 peptide. 2010. doi:10.2210/pdb2rr4/pdb

1202

1203

1204

1205

1206

## 1207 **Supplementary tables**

1208

1209 **Supplementary Table 1.** Genes identified in this study. For *PRDM9* and each candidate gene  
1210 that was initially identified as significantly coevolving with *PRDM9* (*ZCWPW1*, *MEI1*, *ZCWPW2*,  
1211 *TEX15*, and *FBX047*), we provide a table detailing, for each ortholog that we identified, which  
1212 species it is from, how we identified it, its inferred domain architecture, its amino acid sequence,  
1213 as well as various details about these domains (including their coordinates, e-values, and  
1214 sequences). For *PRDM9* orthologs, we additionally report which amino acid residues align to  
1215 three catalytic tyrosine residues in the human SET domain.

1216

1217 **Supplementary Table 2.** Description of genes found from whole genome sequences. For  
1218 *PRDM9* and each gene initially identified as significantly coevolving with *PRDM9* (*ZCWPW1*,  
1219 *MEI1*, *ZCWPW2*, and *TEX15*), we provide a table detailing where and how each ortholog  
1220 identified in our analysis of whole genome assemblies was obtained. *FBX047* is excluded from  
1221 this table because no *FBX047* orthologs were identified from whole genome sequences.

1222

1223 **Supplementary Table 3.** Description of species for which a *de novo* assembly of testis  
1224 transcriptomes was generated in order to verify the structure and expression of *PRDM9* and four  
1225 significant genes (*ZCWPW1*, *ZCWPW2*, *TEX15* and *FBX047*). To this end, we used publicly  
1226 available RNA-seq data (downloaded from NCBI) [75] and in a subset of cases indicated with a  
1227 star, generated our own data which are available from the NCBI sequence read archive  
1228 (Bioproject PRJNA605699, SRA accessions: SRR11050679-SRR11050687, see Methods for  
1229 further details).

1230

1231 **Supplementary Table 4.** The distribution of *PRDM9* orthologs across 446 vertebrate species.  
1232 For each species, we describe how many *PRDM9* orthologs we identified of each unique domain  
1233 architecture, the domain architecture of the most complete *PRDM9* ortholog from that species,  
1234 and whether any *PRDM9* ortholog from that species with the most complete domain architecture



1235 has conserved three catalytic tyrosine residues in the SET domain. We additionally include  
1236 columns comparing these results to those previously described in Baker et al. 2017, noting  
1237 instances where we have revised our calls of domain architecture.

1238  
1239 [Supplementary Table 5](#). Description of candidate genes used in the phylogenetic tests. The 241  
1240 genes selected for the tests were based on three different sources: (1) genes most highly co-  
1241 expressed with PRDM9 in mouse testis single cell analyses [31], (2) genes associated with  
1242 variation in recombination phenotypes in humans [33], and (3) genes known to have a role in  
1243 mammalian meiotic recombination from functional studies (as summarized in the review by [32]).  
1244 The genomic coordinates (column named 'Start position') of each gene were based on the  
1245 GRCh38/hg38 human reference. The function of each candidate gene is described based on the  
1246 definition from its source.

1247  
1248 [Supplementary Table 6](#). Presence and absence matrix computed for all candidate genes used  
1249 in phylogenetic tests for coevolution with *PRDM9* (139 genes). We defined a gene as complete  
1250 ("1") when it contained all the domains observed in four representative vertebrate species with a  
1251 complete *PRDM9* sequence, and incomplete ("0") if the gene was not detected in the Refseq  
1252 database or if it did not include all the domains shared across four species (see Methods for  
1253 details).

1254  
1255 [Supplementary Table 7](#). Phylogenetic tests and p-values. P-values were computed by  
1256 evaluating the patterns of presence or absence of *PRDM9* across 189 vertebrates against the  
1257 patterns of presence or absence of candidate genes. Two models were tested using  
1258 BayestraitsV3 [36]: a null model in which *PRDM9* and a given candidate gene evolve  
1259 independently of one another along the phylogeny versus an alternative model in which the gain  
1260 ("1") and loss ("0") of the candidate gene is dependent on the status of *PRDM9* and vice versa.  
1261 See Pagel, 1994 and the BayesTraitsV3.0.2 manual for further discussion of these models and  
1262 rates description.

1263  
1264 [Supplementary Table 8](#). The distribution of PRDM9 and four genes initially found to be  
1265 significantly coevolving with *PRDM9* (*ZCWPW1*, *ZCWPW2*, *TEX15*, and *FBXO47*) across 189  
1266 vertebrate species. *MEI1* is not considered because in the curation of the calls, it was found to be  
1267 present in all species (see text). **(A)** Curated calls for the presence or absence of complete genes  
1268 based on searches of RefSeq, whole genome assemblies, and RNA-seq data (see **Tables S1-**  
1269 **S3**). We additionally include the most complete domain architecture of orthologs from each  
1270 species for each gene. **(B)** Summary of losses inferred for *PRDM9*, *ZCWPW1*, *ZCWPW2*, *TEX15*  
1271 *and FBXO47* among the 189 vertebrate species used in our co-evolutionary test.

1272  
1273 [Supplementary Table 9](#). **(A)** Results of phylogenetic tests when considering the pairwise co-  
1274 evolution of the candidate genes with each other. **(B)** Results of phylogenetic tests when  
1275 considering the SSXRD domain in *PRDM9* classification. P-values were computed by evaluating  
1276 the patterns of presence or absence of *PRDM9* across 189 vertebrates against the patterns of  
1277 presence or absence of candidate genes. Two models were tested using BayestraitsV3 [36]: a  
1278 null model in which *PRDM9* and a given candidate gene evolve independently of one another

1279 along the phylogeny versus an alternative model in which the gain (“1”) and loss (“0”) of a gene  
1280 is dependent on the status of *PRDM9* and vice versa. See [37] and the BayesTraitsV3.0.2 manual  
1281 for further discussion of these models and rates description. (C) Results of phylogenetic tests  
1282 when considering the SSXR domain in *PRDM9* classification and the curated calls for  
1283 *ZCWPW1*, *ZCWPW2*, *TEX15*, and *FBXO47*.

1284  
1285 **Supplementary Table 10.** Tests for differences in the rates of amino acid evolution in three  
1286 significant genes (*ZCWPW1*, *ZCWPW2*, *TEX15* and *FBXO47*) between representative species  
1287 with and without a *PRDM9* ortholog. To determine whether species lacking a *PRDM9* ortholog  
1288 showed evidence for relaxed selection pressures in co-evolving genes, we estimated  $\omega$ (dN/dS)  
1289 using the Branch model within PAML [76] under two models: a null model assuming the same  $\omega$   
1290 across all branches of the phylogeny, and an alternative model in which there are two  $\omega$  values  
1291 allowed: one  $\omega$  value in species lacking a functional *PRDM9* and a second  $\omega$  for the rest of the  
1292 branches. The clades evaluated in each test are specified. The species used in the alignment for  
1293 each test are also shown. The log likelihoods for each model,  $\omega$  estimates and p-values are also  
1294 provided. See Methods for details.

1295  
1296 **Supplementary Table 11.** Testing the direction of dependency between *PRDM9* and candidate  
1297 genes *ZCWPW1*, *ZCWPW2*, *TEX15* and *FBXO47*. Here, we asked whether we could reject a  
1298 model of independent state transitions of *PRDM9* and a given candidate gene (e.g. *ZCWPW1*) in  
1299 favor of a model in which state transitions of the candidate gene depend on those of *PRDM9*  
1300 (model X). Next, we asked whether we could reject the null model in favor of a model in which the  
1301 state transitions of *PRDM9* depend on those of the candidate gene (model Y). For comparison,  
1302 we also provide results for the test shown in the main text, in which the alternative considered is  
1303 that state transitions of *PRDM9* depend on those of the candidate gene and vice versa (also  
1304 shown in Table 1). See Pagel, 1994 and the BayesTraitsV3.0.2 Manual for further description of  
1305 these models and tests.

1306  
1307  
1308  
1309  
1310  
1311  
1312  
1313  
1314  
1315  
1316  
1317  
1318  
1319  
1320  
1321  
1322

1323

1324

## 1325 Supplementary figures

1326

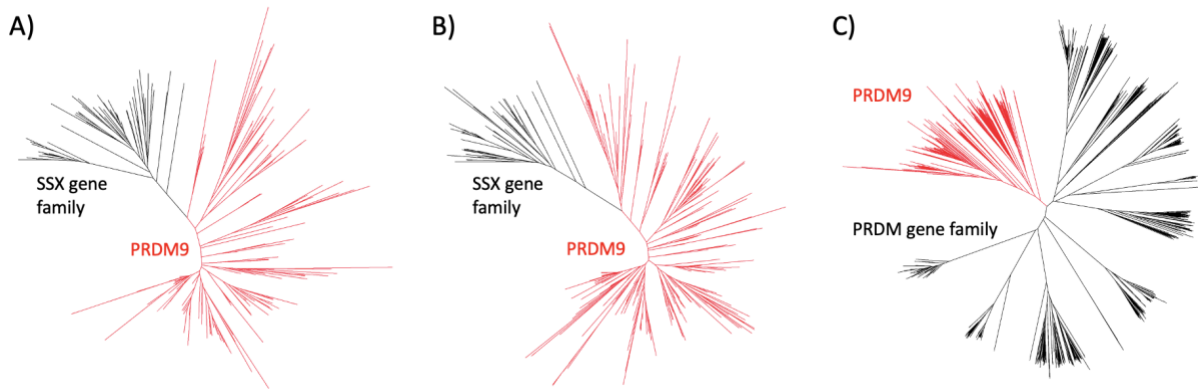

1327

1328 **Figure S1.** Guide trees created from our initial blastp search results for PRDM9 orthologs for **(A)**

1329 KRAB domains, **(B)** SSXRD domains and **(C)** SET domains. Genes were removed if they

1330 clustered with SSX genes in trees **(A)** or **(B)**, or if they clustered with PRDM gene family genes

1331 other than *PRDM9* or *PRDM7* in the tree **(C)**. Genes clustering with *PRDM9* and retained for

1332 subsequent analysis are shown in red.

1333

1334

1335

1336

1337

1338

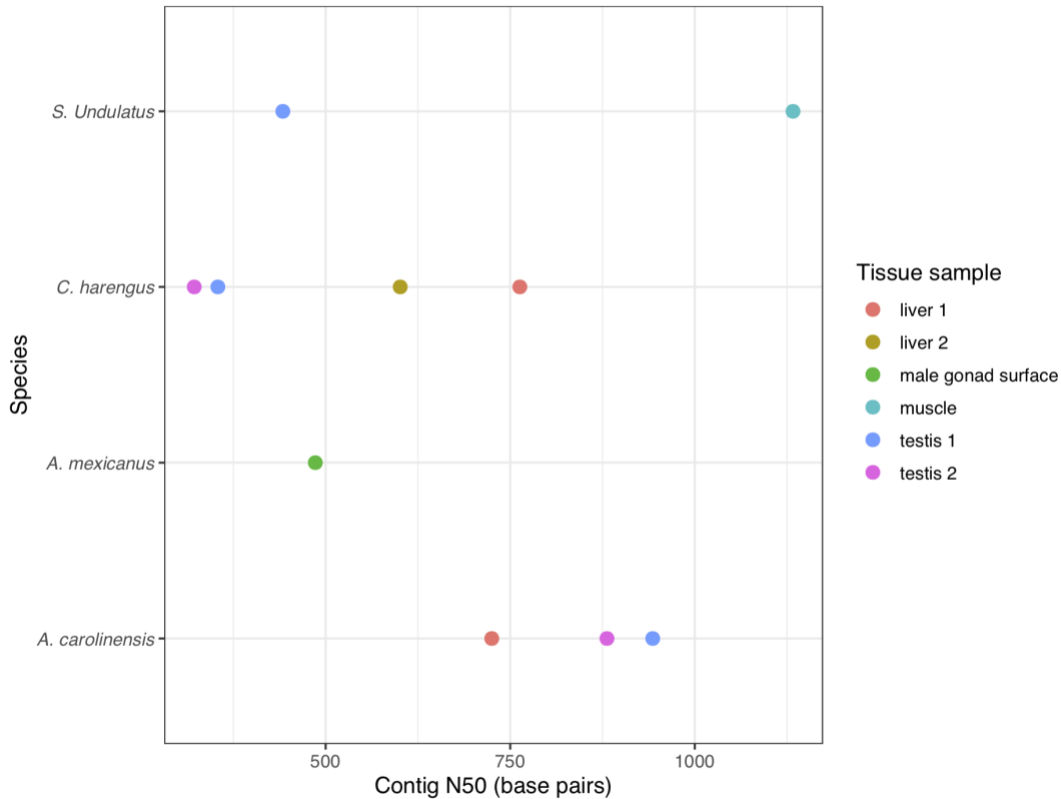

1339  
1340  
1341  
1342  
1343  
1344

**Figure S2.** Contig N50 in base pairs as a statistic describing the quality of *de novo* transcriptome assemblies. Colors represent the different tissues used in the two lizard species (*S. undulatus* and *A. carolinensis*) and two fish species (*C. harengus* and *A. mexicanus*).

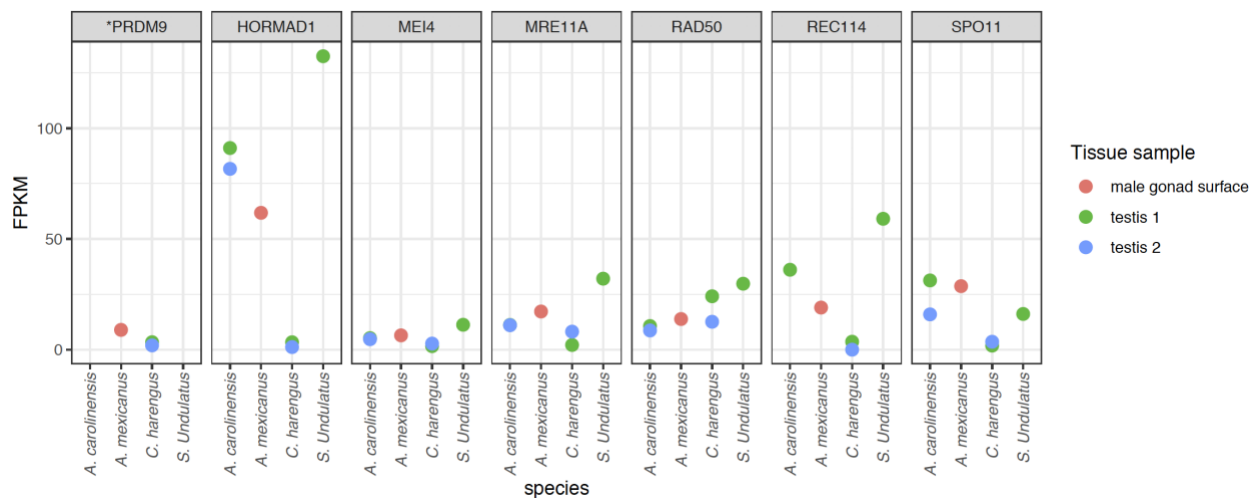

1345  
1346  
1347  
1348  
1349  
1350

**Figure S3.** Expression levels of six core meiosis-related genes [32] across species and tissues. The y-axis corresponds to fragments per kilobase of transcript per million mapped reads (FPKM). Despite evidence for expression of the other six core meiotic genes, PRDM9 expression is not detected in *S. undulatus* and *A. carolinensis*.

1351

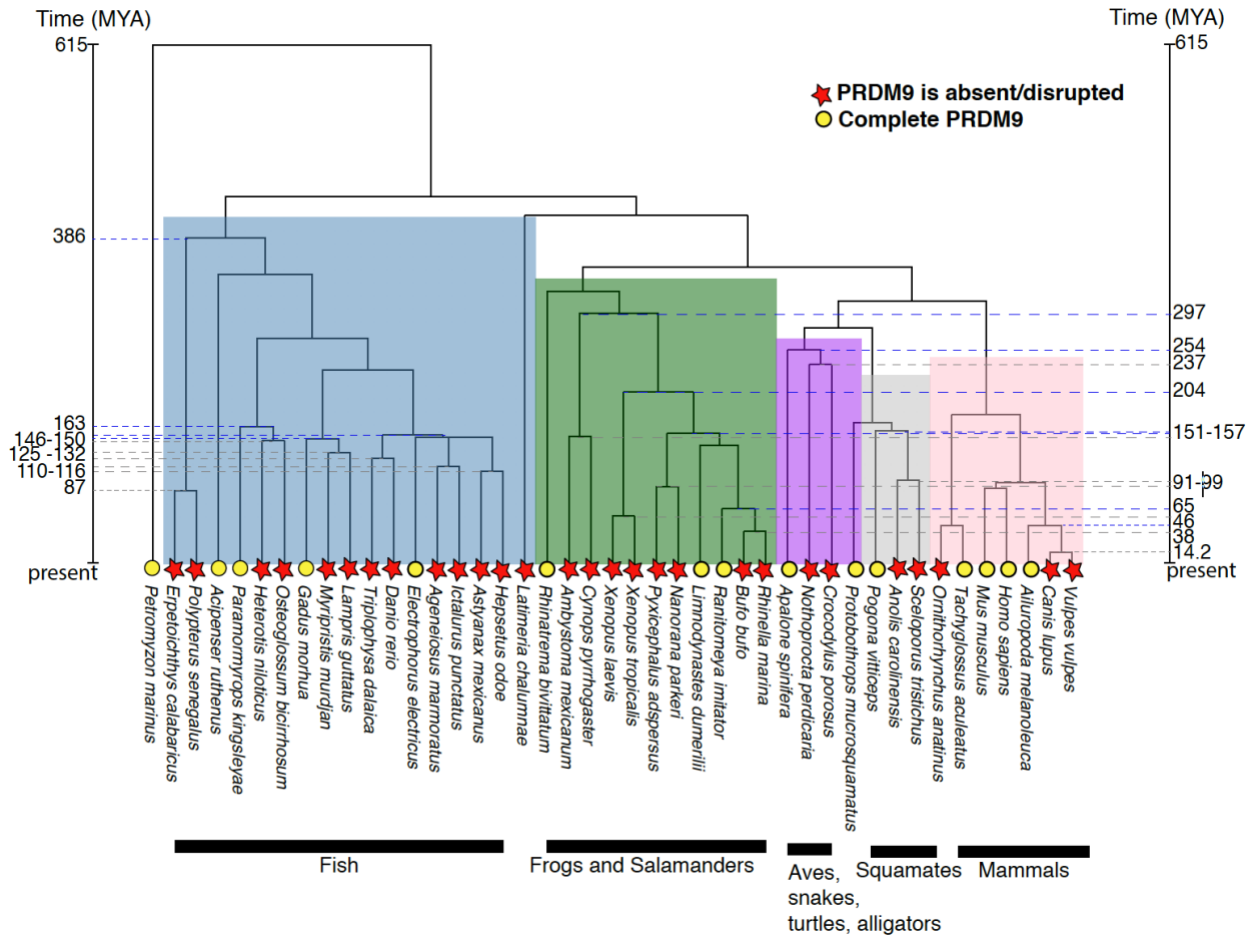

1352

1353

1354

1355

1356

1357

1358

1359

1360

1361

1362

1363

1364

**Figure S4.** Phylogenetic distribution of *PRDM9* orthologs in vertebrates, using the phylogenetic tree and divergence dates obtained from Timetree [35]. A complete *PRDM9* was found in species marked with yellow circles. Species marked with a red star are ones for which we were unable to identify a complete *PRDM9*. The highlighted dates indicate the inferred timing of the multiple *PRDM9* losses. Dashed lines indicate the earliest (grey) and latest (blue) possible dates for each loss of *PRDM9*. The minimum date reflects the time to the most recent common ancestor amongst species without *PRDM9*, whereas the ‘maximum date’ is the time to the first common ancestor between species without *PRDM9* and the most closely related species with *PRDM9*. The most recent loss of *PRDM9* occurred either in the branch leading to canids, between 14.2 and 46 million years ago (Mya), or potentially the branch leading to platypus.



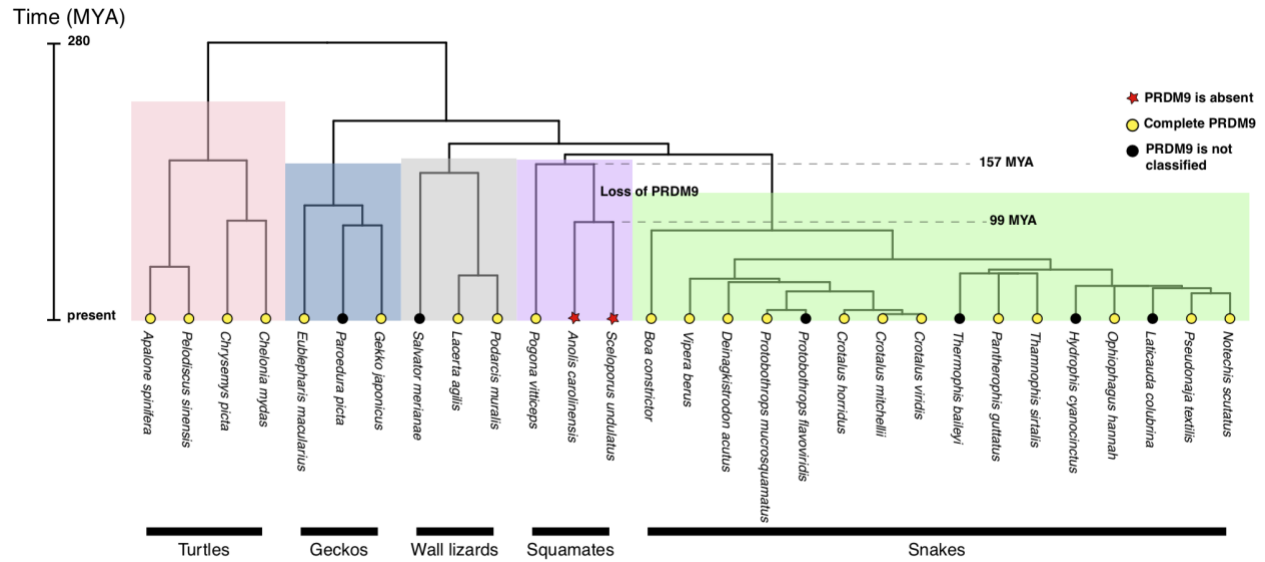

1365  
1366  
1367  
1368  
1369  
1370  
1371  
1372  
1373  
1374  
1375  
1376  
1377  
1378

**Figure S5.** Phylogenetic distribution of *PRDM9* orthologs in reptiles, using the phylogenetic tree and divergence dates obtained from Timetree [35]. Species assigned with yellow circles carry a complete *PRDM9*. Species indicated with a red star are ones for which we were unable to identify *PRDM9* expression in testis samples. Species indicated with a black circle are species for which Refseq is not available and *PRDM9* classification was therefore not conducted. Based on the phylogenetic relationship between *Anolis carolinensis* and *Sceloporus undulatus*, the *PRDM9* loss shared by these two species likely occurred between 99 and 157 million years ago (Mya).

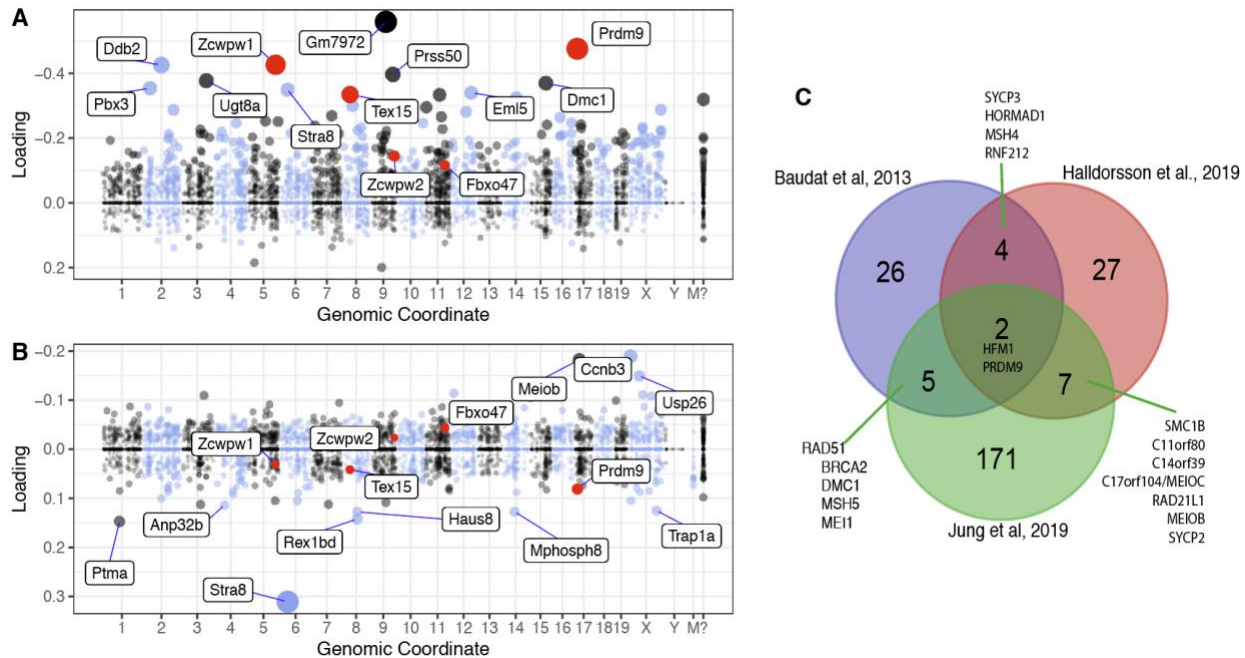

1379  
1380  
1381  
1382  
1383  
1384  
1385  
1386  
1387  
1388  
1389  
1390  
1391  
1392  
1393  
1394  
1395

**Figure S6.** Meiosis-specific candidate genes. [31] inferred 46 principal components from single cell expression patterns during mouse spermatogenesis, which are thought to loosely correspond to regulatory programs. Shown in A-B are the two components in which PRDM9 is most highly expressed. The dot sizes are proportional to the square of the absolute value of the loading, so are indicative of higher expression within each component. PRDM9 and the five genes with  $p < 0.05$  in our phylogenetic analysis are shown in red. Mouse genomic coordinates are displayed. **(A)** Component 5 is the one in which PRDM9 has its highest loading; it is associated with double strand break formation and active during (pre)leptotene [31]. **(B)** Component 44 is the component in which PRDM9 has its second highest loading; this component is active during zygotene (Jung et al., 2019). **(C)** Intersection of candidate genes from three sources: (i) the top 1 percent of genes with highest loadings in component 5 (ii) genes associated with variation in recombination phenotypes in humans [33] and (iii) genes known to have a role in mammalian meiotic recombination from functional studies (as summarized in the review by [32]).

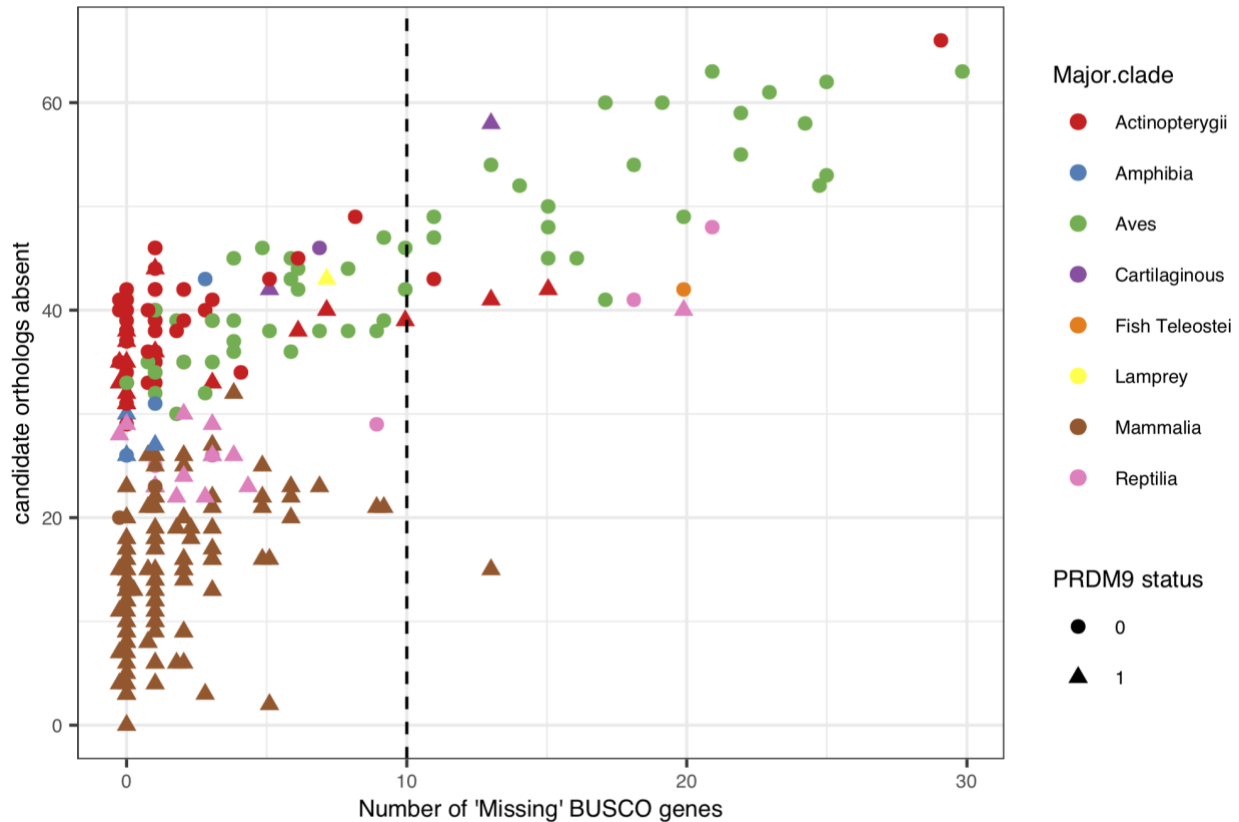

1396  
1397  
1398  
1399  
1400  
1401  
1402  
1403  
1404  
1405  
1406  
1407  
1408  
1409  
1410  
1411  
1412  
1413  
1414  
1415  
1416

**Figure S7.** The relationship between the number of candidate genes that were absent in a genome assembly and the number of 'Missing' BUSCO genes [66] for that assembly, across species. BUSCO statistics were computed for the genomes of 339 species. The relationship is significant (Spearman's rank correlation  $\rho = 0.5$ ,  $p$ -value  $< 2.2e-16$ ), suggesting that orthologs of candidate genes of interest might be missed in genomes with low BUSCO scores. In the phylogenetic tests, we therefore considered only species with 10 or fewer missing BUSCO genes (dashed line), leading 32 species to be excluded.

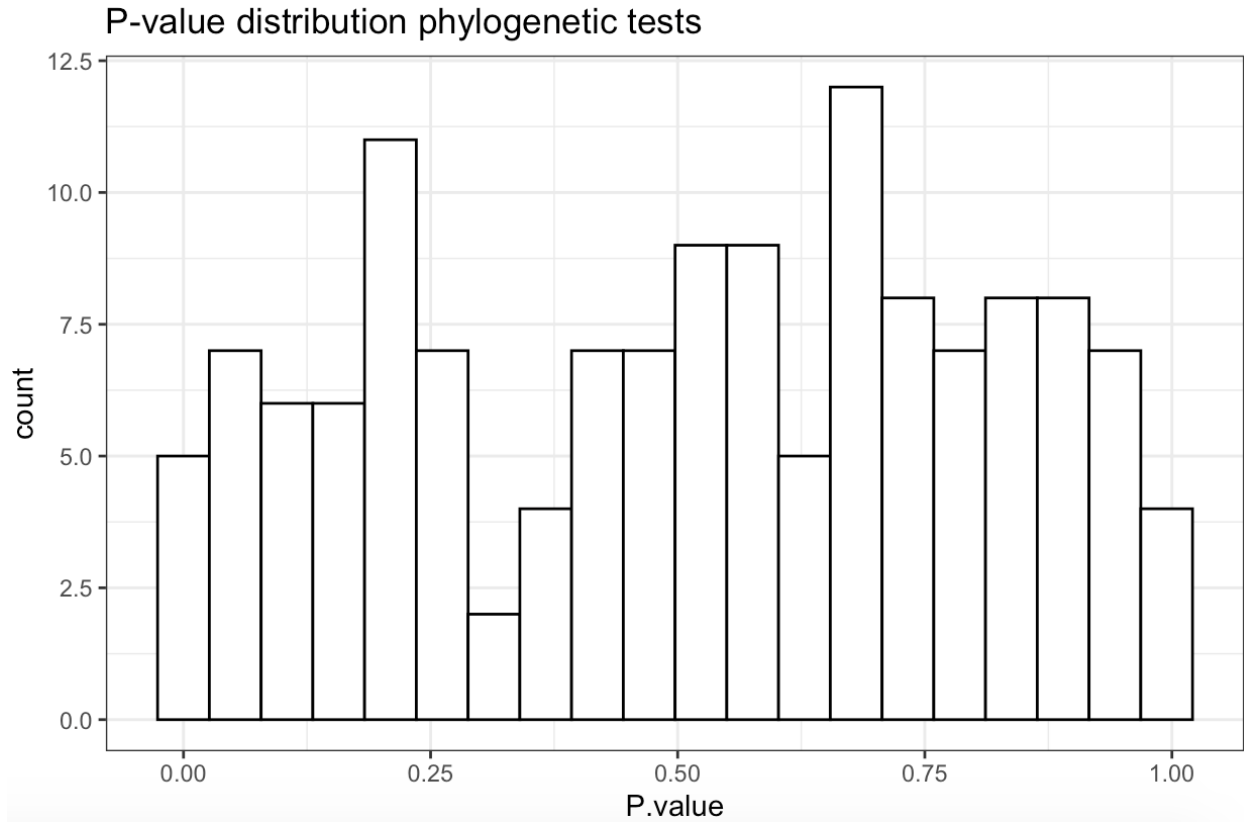

1417  
1418  
1419  
1420  
1421  
1422  
1423  
1424  
1425

**Figure S8.** The distribution of p-values obtained across the 139 genes included in phylogenetic tests (individual p-values are available in **Table S7**).

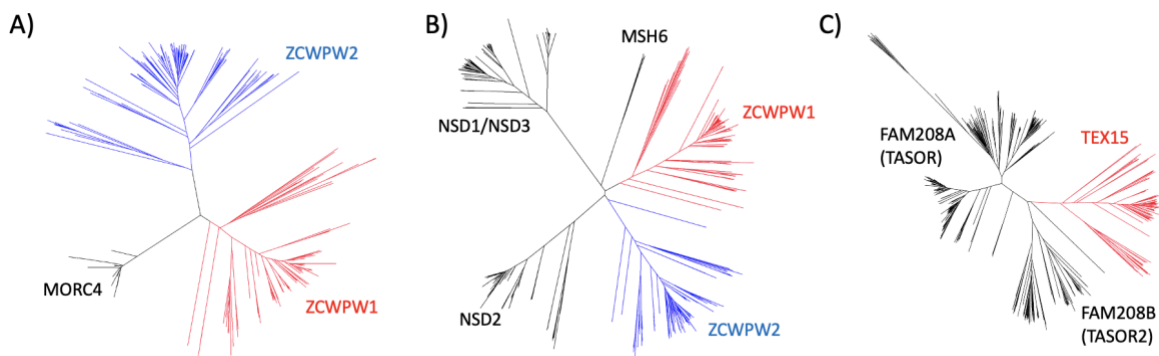

1426  
1427  
1428  
1429  
1430

**Figure S9.** Guide trees created from our initial blastp search results for the zf-CW (A) and PWWP (B) domains of ZCWPW1 and ZCWPW2 orthologs, and the DUF3715 domain of TEX15

1431 orthologs. Genes were removed if they clustered with *MORC4* in tree **A**, *MSH6*, *NSD1*, *NSD2*, or  
 1432 *NSD3* in tree **B**, *FAM208A* or *FAM208B* in tree **C**. Genes clustering with *ZCWPW1*, *ZCWPW2* or  
 1433 *TEX15* and retained for subsequent analysis are shown in red or blue.  
 1434  
 1435  
 1436  
 1437  
 1438  
 1439  
 1440

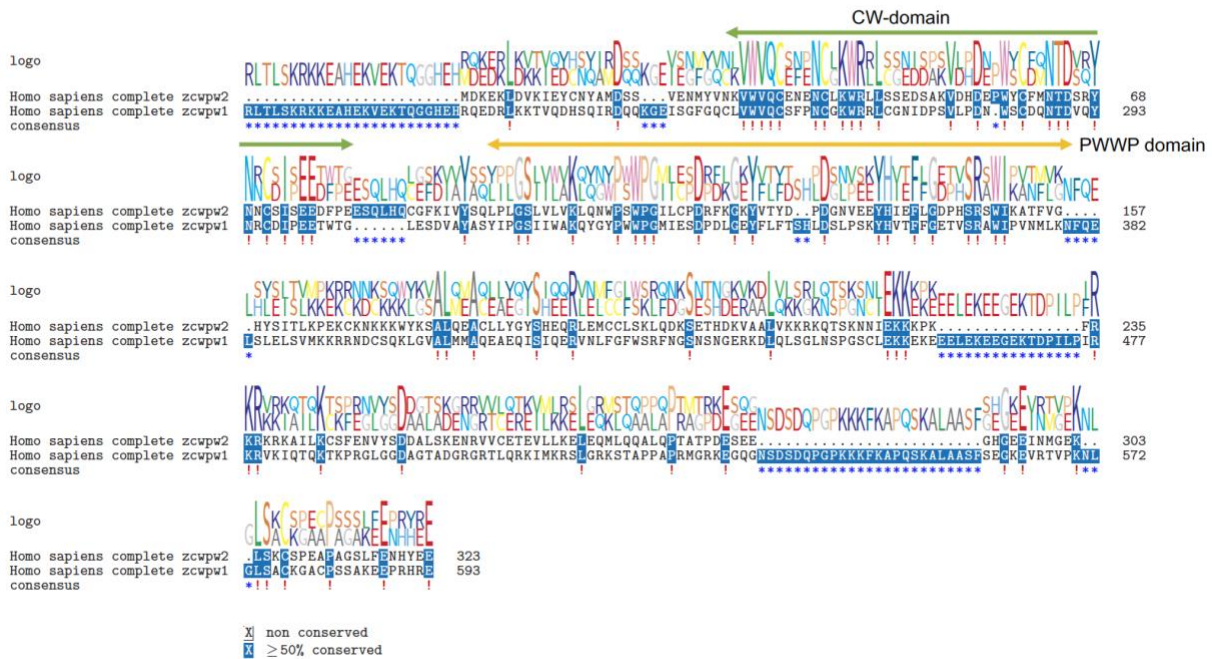

1441  
 1442 **Figure S10:** Amino acid sequence alignment between ZCWPW1 and ZCWPW2 proteins from  
 1443 humans. Superfamily domains are marked. In mice, the CW-domain (green arrow) recognizes  
 1444 different methylated states of lysine 4 on histone H3 (H3K4me) [77], while the PWWP domain  
 1445 (yellow arrow) recognizes methylated H3K36 histone tail [74]. The SET domain of PRDM9 tri-  
 1446 methylates both histones H3K4 and H3K36 [58].  
 1447  
 1448  
 1449

## 1450 References Supplementary File

1451 Baker, Zachary, Molly Schumer, Yuki Haba, Lisa Bashkirova, Chris Holland, Gil G. Rosenthal,  
 1452 and Molly Przeworski. 2017. "Repeated Losses of PRDM9-Directed Recombination despite the  
 1453 Conservation of PRDM9 across Vertebrates." *eLife* 6 (June).  
 1454 <https://doi.org/10.7554/eLife.24133>.  
 1455



- 1456 Barker, Daniel, and Mark Pagel. 2005. "Predicting Functional Gene Links from Phylogenetic-  
1457 Statistical Analyses of Whole Genomes." *PLoS Computational Biology* 1 (1): e3.  
1458
- 1459 Baudat, Frédéric, Yukiko Imai, and Bernard de Massy. 2013. "Meiotic Recombination in  
1460 Mammals: Localization and Regulation." *Nature Reviews. Genetics* 14 (11): 794–806.  
1461
- 1462 Halldorsson, Bjarni V., Gunnar Palsson, Olafur A. Stefansson, Hakon Jonsson, Marteinn T.  
1463 Hardarson, Hannes P. Eggertsson, Bjarni Gunnarsson, et al. 2019. "Characterizing Mutagenic  
1464 Effects of Recombination through a Sequence-Level Genetic Map." *Science* 363 (6425).  
1465 <https://doi.org/10.1126/science.aau1043>.  
1466
- 1467 He, F., Y. Muto, M. Inoue, T. Kigawa, M. Shirouzu, T. Terada, S. Yokoyama, and RIKEN  
1468 Structural Genomics/Proteomics Initiative (RSGI). 2010. "Complex Structure of the Zf-CW  
1469 Domain and the H3K4me3 Peptide." <https://doi.org/10.2210/pdb2rr4/pdb>.  
1470
- 1471 Jung, Min, Daniel Wells, Jannette Rusch, Suhaira Ahmad, Jonathan Marchini, Simon R. Myers,  
1472 and Donald F. Conrad. 2019. "Unified Single-Cell Analysis of Testis Gene Regulation and  
1473 Pathology in Five Mouse Strains." *eLife* 8 (June). <https://doi.org/10.7554/eLife.43966>.  
1474
- 1475 Kumar, Sudhir, Glen Stecher, Michael Suleski, and S. Blair Hedges. 2017. "TimeTree: A  
1476 Resource for Timelines, Timetrees, and Divergence Times." *Molecular Biology and Evolution* 34  
1477 (7): 1812–19.  
1478
- 1479 NCBI Resource Coordinators. 2018. "Database Resources of the National Center for  
1480 Biotechnology Information." *Nucleic Acids Research* 46 (D1): D8–13.  
1481
- 1482 Pagel, Mark. 1994. "Detecting Correlated Evolution on Phylogenies: A General Method for the  
1483 Comparative Analysis of Discrete Characters." *Proceedings of the Royal Society of London.  
1484 Series B: Biological Sciences* 255 (1342): 37–45.  
1485
- 1486 Qin, Su, and Jinrong Min. 2014. "Structure and Function of the Nucleosome-Binding PWWP  
1487 Domain." *Trends in Biochemical Sciences* 39 (11): 536–47.  
1488
- 1489 Waterhouse, Robert M., Mathieu Seppey, Felipe A. Simão, Mosè Manni, Panagiotis Ioannidis,  
1490 Guennadi Klioutchnikov, Evgenia V. Kriventseva, and Evgeny M. Zdobnov. 2018. "BUSCO  
1491 Applications from Quality Assessments to Gene Prediction and Phylogenomics." *Molecular  
1492 Biology and Evolution* 35 (3): 543–48.  
1493
- 1494 Wu, Hong, Nikolas Mathioudakis, Boubou Diagouraga, Aiping Dong, Ludmila Dombrovski,  
1495 Frédéric Baudat, Stephen Cusack, Bernard de Massy, and Jan Kadlec. 2013. "Molecular Basis  
1496 for the Regulation of the H3K4 Methyltransferase Activity of PRDM9." *Cell Reports* 5 (1): 13–20.  
1497
- 1498 Yang, Ziheng. 1997. "PAML: A Program Package for Phylogenetic Analysis by Maximum  
1499 Likelihood." *Bioinformatics*. <https://doi.org/10.1093/bioinformatics/13.5.555>.
- 1500
